# Supplementary material for: Identifying regional contamination patterns in glass recycling at medieval Tusculum (Italy)
Source: Research Square preprint supplement (doi:10.21203/rs.3.rs-8755515/v1), 2026-02-11
Supplement: Supplementary file 1 [file 0995ac764860798a0cf60f6a.xlsx]

## Sheet: Dataset
Supplementary Table S1: LA-ICP-MS data of the glass from Tusculum (Italy); major and minor oxides as wt%, trace elements in ppm.
Glass group	Sample	optical spectra	thickness (mm)	colour	year excavation	area	US	Type	Chronology	Na2O	MgO	Al2O3	SiO2	P2O5	Cl	K2O	CaO	TiO2	MnO	Fe2O3	CuO	Sb2O3	Li	B	V	Cr	Co	Ni	Cu	Zn	Ga	As	Rb	Sr	Y	Zr	Nb	Mo	Ag	Cd	In	Sn	Sb	Cs	Ba	La	Ce	Pr	Nd
Roman Mn	Tus 017			colourless	2022	area G	10110	window pane	non id	16.067	0.312374	1.90322	73.8675	0.0895269	1.12291	0.345508	5.74305	0.0447119	0.125905	0.275567	0.000399896	0.000144823	1.56875	120.421	7.03346	8.98983	1.83153	3.93259	3.19457	7.76621	2.5119	0.497445	4.2887	275.451	4.90675	32.2586	0.910805	0.527047	0.0140938	0.0179075	0	0.721914	1.20979		149.797	4.96234	8.33293	1.10059	4.60241
Roman Mn	Tus 019	Fe2+ & Fe3+	0.924	colourless	2023	area G	10259	beaker	2nd-3rd	16.0957	0.568395	2.68259	69.3359	0.139191	0.939461	0.645898	7.76983	0.0596053	1.246	0.380093	0.00141078	0.000163163	0.0842951	103.099	12.7621	8.55444	3.4282	8.3405	11.27	15.4265	5.19368	1.2748	11.6381	413.75	6.6241	32.8048	1.22195	5.04159	0.0225814	0.0198611	0	1.35515	1.36298	0.000266721	307.176	6.18649	11.1151	1.38005	5.87365
Roman Mn	Tus 020		1.072	colourless	2023	area G	10259	beaker	2nd-3rd	13.8059	0.74464	2.71903	71.0495	0.0879912	0.889591	0.419802	8.31143	0.0685278	1.33717	0.424103	0.000985865	0.000182901	0.23165	106.88	12.3681	12.1856	3.66873	7.74496	7.87558	15.1611	5.38893	0.986476	8.27851	448.667	6.95748	40.8647	1.32524	3.15026	0.020755	0.0716361	0	1.9451	1.52787		297.417	6.6486	11.7331	1.46168	6.2671
Roman Mn	Tus 041	Fe2+ & Fe3+	2.87	colourless / greyish	2023	area G	10261	window pane	2nd-3rd	14.4606	0.472234	2.4418	71.8326	0.14113	0.933919	0.471422	7.62676	0.0482859	1.13812	0.294016	0.00172762	0.000233251	2.41075	91.9903	16.2331	8.85624	3.4083	7.9186	13.8011	13.3668	3.95836	2.23377	6.14205	445.454	6.34726	32.2016	0.994704	3.12006	0.011921	0.0572677	0	0.769827	1.94847	0.0325613	314.767	5.86237	9.91609	1.28108	5.50501
Roman Mn	Tus 044	Fe3+	2.661	colourless / greyish	2023	area G	10206	window pane	2nd-3rd	14.8884	0.500823	2.22377	71.0502	0.179151	1.10457	0.400589	7.63564	0.0553266	1.45295	0.350399	0.0011627	0.000132243	2.03522	112.858	39.2795	10.8576	9.5876	16.3501	9.28823	21.3606	4.36108	2.00657	5.96548	485.145	6.70631	34.9842	1.11199	4.52612	0.0202421	0.0764881	0	1.05049	1.1047	0.0166551	325.554	6.26555	10.2177	1.35715	5.70897
Roman Mn	Tus 051		1.822	colourless	2024	area G	10442	window pane	2nd-3rd	16.2061	0.711763	2.85958	67.8327	0.115086	0.910015	0.494252	8.75387	0.0736368	1.37864	0.498884	0.000805991	0.000401778	3.8658	131.278	20.5204	10.5731	9.73761	8.24885	6.43866	13.0269	4.77575	2.36202	7.85501	480.565	7.05148	35.1202	1.39548	1.66022	0.0429152	0.0507057	0.00297053	0.838188	3.35626	0.0491981	374.47	6.51056	11.7143	1.48954	6.0528
Roman Mn	Tus 055A		3.85	colourless / greyish	2022	area G	10110	window pane	2nd-3rd	14.8596	0.502741	2.03114	71.3796	0.179802	1.07762	0.312366	7.66159	0.0562786	1.42728	0.35503	0.00114679	0.000205785	2.75081	113.062	39.011	10.054	9.48941	16.3058	9.16114	20.7043	4.19874	1.93463	6.04529	480.472	6.70312	35.32	1.08218	4.32392	0.0141758	0.0345003	0	1.07031	1.71903	0.026965	317.663	6.20783	10.1607	1.34479	5.74874
Roman Mn	Tus 055B	Fe3+	2.153	colourless / greyish	2022	area G	10110	window pane	2nd-3rd	14.9302	0.511929	2.10859	71.1654	0.17718	1.03974	0.340854	7.75708	0.0572518	1.39729	0.359855	0.00112288	0.000105986	2.54134	108.759	37.798	10.7796	9.17226	15.7913	8.97016	19.411	4.25818	1.89075	5.943	484.889	6.78937	35.5388	1.12005	3.97867	0.0140727	0.0589291	0	0.95712	0.885355	0.0485906	314.409	6.15424	10.323	1.33609	5.74899
Roman Mn	Tus 060	Fe2+ & Fe3+	2.484	bluish tinge	2023	area G	10259	vessel non id	2nd-3rd	16.0303	0.364174	2.01914	72.505	0.134829	1.15818	0.474382	6.69494	0.0522483	0.156165	0.298958	0.00053354	0.000533552	2.66091	114.89	7.68472	9.16529	2.06744	4.58016	4.26218	11.4703	2.4884	1.03612	5.43712	331.512	5.69947	35.3875	1.05714	0.478263	0.033658	0.0254271	0	0.969667	4.45704	0.0227865	161.535	5.5618	9.3279	1.24311	5.08487
Roman Mn	Tus 079	Fe3+	2.841	colourless / greyish	2022	area G	10126	window pane	2nd-3rd	14.907	0.507485	2.24358	70.9176	0.176444	1.05714	0.404786	7.76068	0.056572	1.45455	0.356131	0.00115294	0.00033141	3.58657	104.302	40.0673	12.8463	9.61039	16.3739	9.21027	19.5338	4.22735	2.25459	6.00437	495.394	6.86477	36.1221	1.14084	4.2957	0.0201582	0.0710948	0	1.08891	2.76844	0.0500464	328.373	6.46346	10.4144	1.34428	5.61776
Roman Mn	Tus 080			colourless / greyish	2022	area G	10126	window pane	2nd-3rd	14.7349	0.506779	2.37209	70.7888	0.168675	1.02879	0.441704	7.9011	0.0567455	1.48031	0.358965	0.00114855	0.00028814	3.77927	101.8	40.322	13.1175	9.71962	16.7498	9.17516	20.9943	4.28812	2.0356	6.16063	504.977	6.88456	36.5734	1.17082	4.13186	0.0316375	0.0376672	0.000605475	1.13536	2.40699	0.0599005	335.309	6.55961	10.5804	1.38782	5.91451
Roman Mn	Tus 088	Fe3+	1.053	colourless	2023	area G	10205	beaker	2nd-3rd	16.071	0.575722	2.83649	68.9123	0.13893	0.941278	0.7287	7.9489	0.0608727	1.26395	0.382311	0.00134939	0.0003873	3.12378	94.0531	12.9198	10.2771	3.47033	7.8383	10.7796	15.8863	4.45278	2.7641	11.661	428.517	6.79974	34.044	1.23849	4.95381	0.0438926	0.0908045	0.00073011	1.4997	3.23532	0.0941986	316.286	6.5074	11.5981	1.41585	5.91983
Roman Mn	Tus 120B	Fe3+	2.523	colourless / greyish	2022	area G	10110	shaped window pane	2nd-3rd	15.0233	0.499909	2.47333	70.573	0.171717	1.05144	0.529303	7.64091	0.0544949	1.46883	0.354781	0.00113065	0.000951941	2.96244	103.531	39.8861	14.3527	9.59415	16.6975	9.03221	19.6692	4.16236	2.22712	5.96775	489.629	6.71078	35.1315	1.10936	4.4154	0.0199146	0.0862926	0.00160787	1.03088	7.95206	0.0251636	318.71	6.23346	10.0978	1.32181	5.48424
Roman Mn	Tus 120C	Fe3+	4.023	colourless / greyish	2022	area G	10110	shaped window pane	2nd-3rd	14.8553	0.496615	2.42758	70.7991	0.177392	1.06812	0.514437	7.67862	0.0557667	1.41623	0.353714	0.00111845	0.000439812	2.06289	103.786	38.6562	14.2997	9.3614	16.4722	8.93476	19.6677	4.03403	2.13037	5.97899	488.239	6.68834	35.5277	1.09774	4.05211	0.0211769	0.121858	0	1.02169	3.67398	0.0355132	321.195	6.27928	10.2519	1.32749	5.58435
Roman Mn	Tus 120D	Fe3+	2.21	colourless / greyish	2022	area G	10110	shaped window pane	2nd-3rd	14.9012	0.500813	2.37505	70.7382	0.174218	1.06769	0.490653	7.68341	0.0557491	1.49495	0.357756	0.00115458	0.000171065	2.50272	103.617	41.1352	14.6639	9.81048	16.7822	9.22334	19.9325	4.20862	1.99147	5.8822	495.927	6.82132	36.0075	1.11636	4.509	0.0165836	0.0881473	0.00340691	1.06749	1.429	0.0266346	329.352	6.3837	10.3745	1.34121	5.77967
Roman Mn rec	Tus 013		0.789	slight yellowish tinge	2023	area G	10239	Beaker/goblet	non id	15.1604	0.55196	2.41235	70.0732	0.127422	1.14286	0.4737	8.05549	0.0529352	1.4286	0.357174	0.00112289	0.0133258	3.57722	99.6365	25.8855	11.0485	6.94173	11.3582	8.97022	20.0266	4.21089	3.78684	8.02122	492.162	7.08478	35.0172	1.18611	7.40131	0.0258569	0.0622359	0.00181794	1.56666	111.317	0.119323	289.711	6.57063	11.2442	1.39979	5.94139
Roman Mn rec	Tus 018A	Fe3+	2.364	colourless / greyish	2023	area G	10259	shaped window pane	non id	15.6813	0.576474	2.66691	69.5279	0.135395	0.8818	0.580983	7.84667	0.0547651	1.49746	0.368118	0.00315661	0.00451812	1.30688	145.911	25.9708	9.99784	9.01727	19.1307	25.2165	23.0393	5.1976	1.8674	7.82736	530.744	6.97259	35.4175	1.12481	3.20431	0.142849	0.058713	0	1.52208	37.7422		318.798	6.5517	10.8832	1.45652	6.05475
Roman Mn rec	Tus 018B	Fe3+	1.608	colourless	2023	area G	10259	shaped window pane	non id	15.5449	0.691694	2.34269	69.4072	0.217128	1.09788	0.472773	7.82207	0.0691653	1.57285	0.521354	0.00328453	0.0545592	1.24556	148.734	27.6404	8.93814	17.4387	18.1806	26.2384	29.7316	5.43492	1.92201	6.61442	529.048	6.98023	40.2606	1.37579	4.74205	0.0470437	0.055558	0	8.70303	455.761		324.965	6.84834	11.3351	1.50238	6.45475
Roman Mn rec	Tus 018C	Fe3+	3.477	colourless yellowish/greenish tinge	2023	area G	10259	shaped window pane	non id	15.9499	0.559718	2.28313	70.0887	0.149994	0.940749	0.486133	7.50651	0.0537357	1.43978	0.361658	0.00328112	0.00476024		157.683	26.1603	8.04378	9.01852	19.2045	26.2112	25.3343	5.03443	1.67649	7.98376	503.709	6.69729	33.9562	1.12993	3.47107	0.0253739	0.0861126	0	1.54497	39.7647		304.759	6.40031	10.3964	1.3938	5.94865
Roman Mn rec	Tus 018D		1.454	colourless / greyish	2023	area G	10259	shaped window pane	non id	15.8472	0.561282	2.24998	70.2336	0.149189	0.955911	0.473238	7.49123	0.053523	1.44227	0.363468	0.00331982	0.00469393		156.381	26.3251	7.78503	8.94553	19.3527	26.5204	24.2588	5.07655	1.64965	7.89469	502.635	6.7787	34.048	1.16001	3.48039	0.0343906	0.0805043	0	1.51108	39.2109		303.64	6.32656	10.4588	1.37605	5.82471
Roman Mn rec	Tus 026	Fe2+ & Fe3+	3.297	blusih	2024	area G	10470	bottle	2nd-3rd	17.0197	0.539362	2.58875	69.0117	0.129483	0.99798	0.636063	7.77246	0.0584502	0.578684	0.429635	0.0194069	0.0305846	4.33029	194.151	12.3336	9.69156	10.7855	8.36718	155.032	19.3082	3.75436	2.20296	17.92	448.888	6.82507	37.6501	1.30254	2.10873	0.149959	0.0426689	0.00575959	22.7053	255.489	0.252105	245.476	6.96174	12.1438	1.51369	6.2063
Roman Mn rec	Tus 035	Fe2+ & Fe3+	2.171	bluish tinge	2023	area G	10173	vessel non id	non id	16.8764	0.504687	2.44985	69.1078	0.100733	1.14533	0.467719	8.20702	0.0532737	0.529045	0.41052	0.00178045	0.00177202	3.43897	117.667	10.9396	9.87615	5.25573	6.78159	14.2231	12.3155	3.49505	1.56078	7.02858	459.918	6.80005	35.713	1.11966	1.04576	0.238751	0.0317145	0.00137474	1.68457	14.8026	0.0705039	272.052	6.143	10.6945	1.36944	5.708
Roman Mn rec	Tus 037	Fe2+ & Fe3+	2.126	bluish tinge	2023	area G	10173	vessel non id	non id	16.8285	0.50009	2.52132	69.078	0.100975	1.14239	0.49253	8.23442	0.053189	0.486648	0.414001	0.00175444	0.00161018	3.36195	118.846	10.4925	10.2367	4.95921	6.34989	14.0153	11.6338	3.44035	1.48452	7.01007	460.12	6.77071	35.7095	1.15766	1.01028	0.218331	0.0307655	0.001649	1.68846	13.4507	0.067879	271.114	6.19298	10.8236	1.38031	5.81994
Roman Mn rec	Tus 042	Fe3+	3.635	colourless / greyish	2022	area G	10097	window pane	2nd-3rd	15.601	0.539645	2.69135	69.7258	0.106098	1.04897	0.449006	7.93582	0.0545398	1.28739	0.362667	0.00119774	0.00355434	2.7493	163.227	55.147	8.2188	9.70567	14.5625	9.56815	16.4646	4.55503	2.92925	7.10399	497.35	7.14203	34.872	1.16589	3.83438	0.0327409	0.047566	0.000746944	1.27677	29.6913	0.0427024	457.452	6.63967	11.1078	1.47726	6.09719
Roman Mn rec	Tus 063	Fe3+	2.08	colourless tinge?	2023	area G	10277	window pane	2nd-3rd	15.9913	0.572122	2.25547	69.8614	0.140841	0.906853	0.460871	7.7129	0.0555025	1.48872	0.371078	0.00335078	0.00542199	2.96016	148.404	27.0672	6.94808	9.27024	19.5517	26.7677	25.4541	4.45677	3.06849	7.94699	527.305	6.90376	35.5283	1.21592	3.30278	0.0328498	0.0298242	0	1.59967	45.2927	0.0333159	316.22	6.6337	10.8293	1.42057	5.97043
Roman Mn rec	Tus 094	Fe3+	0.72	colourless	2023	area G	10292	window pane	10th-12th	15.8651	0.679923	2.72573	68.4923	0.215813	1.15278	0.655467	7.79601	0.0660169	1.62914	0.495264	0.00281133	0.0376371	2.99306	146.561	29.8795	12.2711	16.7202	18.5375	22.4583	28.4318	4.67727	3.3192	6.84144	528.448	7.03905	39.3921	1.37949	4.91775	0.0402475	0.056221	0	6.6283	314.402	0.0507212	336.951	6.96869	11.4088	1.48297	6.11651
Roman Mn rec	Tus 101			colourless	2023	area G	10241	window pane	2nd-3rd	14.7023	0.549452	2.58003	70.4499	0.179091	0.988864	0.643612	7.61493	0.0625964	1.57931	0.423739	0.00243168	0.0514441	3.19827	123.621	24.9411	13.5342	6.21583	14.2696	19.4255	20.513	4.38342	4.44531	6.33515	468.831	6.76617	38.7309	1.29645	3.77697	0.0547626	0.082576	0.000438564	6.83282	429.739	0.0447041	293.635	6.41075	10.7502	1.3597	5.64771
Roman Mn rec	Tus 102	Fe2+ & Fe3+	2.29	bluish tinge	2023	area G	10241	vessel non id	2nd-3rd	16.8116	0.411918	2.75496	70.8291	0.120877	1.1155	0.625994	6.39092	0.0697623	0.307724	0.373766	0.00542258	0.0436469	2.66371	142.593	10.5806	22.9565	4.92035	6.42464	43.3182	13.6701	3.31148	2.46185	11.4168	348.687	6.53715	47.9175	1.43458	0.694448	0.0758853	0.0403633	0.00576901	9.57347	364.605	0.131097	206.127	6.44903	11.0907	1.35649	5.43911
Roman Sb	Tus 025			colourless	2023	area G	10335	Beaker/goblet	2nd-3rd	18.2361	0.404938	1.92195	71.7044	0.0215683	1.1773	0.453628	4.88584	0.05322	0.0146811	0.310309	0.00100474	0.701604	3.4055	134.204	6.74233	6.8422	0.972494	2.43825	8.02637	12.2873	2.48082	19.1792	7.0223	287.726	4.60652	36.3531	1.09738	0.150244	0.096371	0.0606866	0.00185495	0.552905	5860.87	0.0894501	150.853	5.02607	8.62197	1.08996	4.48962
Roman Sb	Tus 040			colourless	2023	area G	10261	vessel non id	non id	19.1527	0.367999	1.88417	70.4401	0.0240872	1.26351	0.387907	5.4813	0.06173	0.0135034	0.318001	0.00107253	0.465672	3.13716	192.437	6.57372	8.7809	0.990262	2.38025	8.56788	14.1853	2.22049	17.8649	5.26453	355.16	5.12232	40.4494	1.15669	0.102818	0.142647	0.129199	0.00386294	1.03087	3890	0.0330631	122.975	5.31102	9.03897	1.15943	4.75699
Roman Sb	Tus 050		2.163	colourless / greyish	2023	area G	10276	vessel non id	2nd-3rd	18.0095	0.310084	1.63941	72.46	0.0189188	1.2328	0.303431	4.92217	0.0477143	0.0147482	0.267411	0.000873402	0.634228	3.35304	217.392	4.87246	6.63969	0.855013	2.02207	6.97717	15.9715	2.14045	23.3675	5.38364	295.27	4.7115	37.0369	0.977275	0.134447	0.136649	0.149887	0.0011202	0.812952	5298.04	0.0632446	128.928	4.88837	8.26006	1.05908	4.45863
Roman Sb	Tus 057 (n=2)		0.339	colourless	2023	area G	10259	Beaker/goblet	2nd-3rd	18.1379	0.298958	1.97643	72.0402	0.0209023	1.23359	0.415715	4.73053	0.0479628	0.0161326	0.255045	0.00108861	0.690569	2.58905	212.72	5.27141	7.87761	0.782694	1.98243	8.69634	12.2245	2.18537	18.4219	5.9831	274.162	4.49411	35.0334	0.980915	0.0996806	0.116336	0.0922867	0.00206317	0.706781	5768.68	0.03863	136.663	4.7655	8.15947	1.048	4.24491
Roman Sb	Tus 058		1.033	colourless	2023	area G	10259	vessel non id	2nd-3rd	17.9721	0.277082	1.70213	72.2962	0.0161357	1.5903	0.339886	4.46932	0.0456696	0.0117478	0.247279	0.0014647	0.882545	1.09214	261.289	4.70716	3.28117	0.742036	2.01916	11.7007	19.7928	2.61981	22.1352	8.33982	263.98	4.17289	32.804	0.94542	0.107026	0.159417	0.0769025	0	0.953249	7372.36	0.150609	131.307	4.54117	8.09451	0.98849	4.09355
Roman Sb	Tus 061 body		2.028	colourless	2023	area G	10277	Beaker/goblet	2nd-3rd	17.2684	0.381819	1.90966	72.3244	0.0167997	1.20145	0.407196	5.30983	0.0552055	0.0148259	0.305702	0.00097332	0.632708	2.92594	300.842	5.43497	6.41984	0.930543	2.29599	7.77536	15.2066	2.31931	27.7658	5.5209	335.317	4.91186	37.6553	1.08436	0.0753791	0.0811924	0.0616943	0.00101065	0.612772	5285.34	0.0449703	127.488	5.17202	8.83671	1.14523	4.6952
Roman Sb	Tus 061 trail (n=2)				2023	area G	10277	Beaker/goblet	2nd-3rd	16.7005	0.456639	1.86228	71.5769	0.0220909	1.16113	0.357341	6.47539	0.0679514	0.0195951	0.389714	0.00114689	0.721054	3.39388	292.708	6.85391	7.0275	1.23309	2.91141	9.16191	16.3803	2.39752	30.9339	5.86983	477.973	5.37367	41.6601	1.31755	0.0946396	0.107827	0.0755275	0.00055752	0.707088	6023.34	0.0535508	137.685	5.68419	9.92885	1.24791	5.11624
Roman Sb	Tus 062		1.496	colourless	2023	area G	10277	goblet stem	2nd-3rd	18.0615	0.34677	1.67088	72.2205	0.0142921	1.2522	0.331943	4.97463	0.045176	0.0129835	0.251878	0.000732873	0.685548	2.53233	199.869	4.7875	5.23968	0.760955	1.96087	5.85455	12.2327	2.06399	12.1713	5.84622	301.684	4.62026	33.5588	0.929607	0.0883469	0.067214	0.0623463	0.160039	0.689871	5726.74	0.0459373	133.477	4.89028	8.24356	1.05361	4.32151
Roman Sb	Tus 081		0.877	colourless	2022	area G	10126	vessel non id	2nd-3rd	18.5206	0.297989	1.84896	71.7403	0.018245	1.2779	0.39522	4.74924	0.0476149	0.0125217	0.256211	0.00111796	0.702164	3.02255	202.677	4.93908	6.9816	0.780567	2.02078	8.93079	13.456	2.2232	19.3992	5.42612	277.466	4.51215	35.5352	0.998264	0.106728	0.119686	0.0748029	0.00240333	0.558239	5865.54	0.0711847	136.02	4.86374	8.23371	1.06552	4.3514
Roman Sb	Tus 082 (n=2)		1.44	colourless	2022	area G	10126	open form non id	2nd-3rd	19.0425	0.340999	1.85933	71.3542	0.0196892	1.19157	0.430744	4.81281	0.051038	0.0191509	0.291453	0.00828695	0.464998	3.11758	141.848	6.22891	7.79339	0.963947	2.21303	66.2002	16.1414	2.13747	13.8777	5.52421	283.183	4.52395	35.8912	1.04583	0.10156	1.27647	0.0949362	0.0075422	0.626044	3884.37	0.0546919	135.382	4.8787	8.33779	1.0628	4.37024
Roman Sb	Tus 089	Co; Fe2+ & Fe3+	1.613	blue	2023	area G	10205	window pane	non id	18.5067	0.484687	1.8807	69.4315	0.0282173	1.12906	0.5176	6.04427	0.0637173	0.0232258	0.899918	0.214738	0.556285	3.62741	212.312	6.98054	8.19621	293.5	12.8479	1715.44	52.1143	3.36722	21.2958	5.51249	453.702	5.01754	44.6884	1.28399	1.77178	0.180565	0.199036	0.335122	21.0723	4646.94	0.0517101	139.16	5.38034	9.31653	1.14269	4.68401
Roman Sb	Tus 092	Fe3+	1.054	colourless	2022	area G	10113	little flask	non id	17.3799	0.517556	1.75158	71.7644	0.0209716	1.12705	0.346386	6.04653	0.0643374	0.0137775	0.347825	0.00144733	0.490935	3.00767	128.604	7.93874	9.30763	1.02736	2.51512	11.562	20.3798	2.18959	20.7829	5.10324	413.302	5.55796	40.1623	1.26886	0.0695231	0.219494	0.0799224	0.00392396	0.681431	4101.04	0.0579019	127.174	5.79356	9.85634	1.25982	5.1215
Roman Sb	Tus 120A		3.413	colourless	2022	area G	10110	shaped window pane	2nd-3rd	17.9853	0.321664	1.95913	71.633	0.0182284	1.23381	0.443147	4.95682	0.0539357	0.0154025	0.290738	0.00163847	0.791497	2.35691	142.359	5.03524	8.59736	0.906685	2.03098	13.0889	11.5112	2.32929	8.61096	5.03332	324.587	4.76105	41.1151	1.10627	0.0476219	0.718575	0.137824	0	26.1387	6611.79	0.0475712	128.258	5.24905	8.98098	1.112	4.52392
Roman Sb	Tus 155		3.348	colourless	2024	area G	10470	jug	2nd-3rd	18.3524	0.405687	1.7753	71.3328	0.0187976	1.2473	0.356537	5.5766	0.0565617	0.0129322	0.300782	0.000862065	0.429251	2.44781	175.687	6.3382	8.30635	0.90363	2.31472	6.8866	12.5729	2.27107	28.3232	5.22624	360.571	5.18368	37.3565	1.10389	0.130542	0.150596	0.115134	0.00122523	0.515217	3585.75	0.0511995	127.508	5.42514	9.15637	1.15574	4.7485
Roman Sb rec	Tus 002			colourless	2023	area G	10180	vessel non id	non id	18.6885	0.430266	1.93808	70.2972	0.0503342	1.20499	0.445278	5.76045	0.0600132	0.132752	0.361812	0.00248625	0.464712	4.24689	222.751	8.84826	9.07278	1.92287	3.34048	19.8614	18.4301	2.62329	21.8197	8.26656	354.022	5.07599	38.7839	1.1706	0.379801	0.198117	0.125575	0.00129359	4.26725	3881.98	0.112992	148.744	5.43323	9.38767	1.19846	4.97066
Roman Sb rec	Tus 007	Fe2+ & Fe3+	2.435	bluish tinge	2023	area O	2000	Beaker/goblet	non id	18.7258	0.561679	2.13423	68.9744	0.0898396	1.1013	0.52495	6.31148	0.0810238	0.252154	0.536354	0.00856413	0.512732	5.01982	179.208	12.7758	11.536	3.91001	5.85974	68.4145	22.7339	3.1917	13.7049	13.3931	393.516	5.74643	52.3028	1.61349	0.862253	0.286239	0.140776	0	24.71	4283.12	0.208285	172.971	6.49939	11.569	1.41763	5.72936
Roman Sb rec	Tus 022	Fe2+ & Fe3+	1.517	bluish tinge	2023	area G	10259	bottle	2nd-3rd	18.6766	0.565482	2.21346	68.7881	0.0918877	1.10958	0.611018	6.33715	0.081432	0.232631	0.55273	0.00969006	0.541501	5.72035	179.357	12.533	11.5757	3.82772	5.71323	77.409	23.4959	3.05819	17.7486	15.3448	387.012	5.66266	52.3497	1.64442	0.749419	0.322893	0.123075	0	25.2076	4523.44	0.264314	173.104	6.4722	11.4186	1.40721	5.70253
Roman Sb rec	Tus 038	Fe3+	1.608	colourless	2015	area R	5208	goblet with solid stem	10th-12th	17.3944	0.519296	2.19308	70.2736	0.060237	1.12425	0.558048	6.40847	0.0666328	0.390643	0.41213	0.00556987	0.422989	6.08029	178.038	12.8588	10.0638	3.65097	5.82608	44.4949	19.7667	3.05245	22.1057	9.40268	410.293	5.61652	42.4541	1.34735	1.05498	0.266427	0.111202	0.00182273	6.61665	3533.45	0.129332	182.662	5.80482	9.99581	1.26625	5.23496
Roman Sb rec	Tus 047			colourless	2022	area G	10123	vessel non id	2nd-3rd	20.7382	0.476581	2.07914	68.2664	0.0392976	1.33614	0.459602	5.23273	0.0863045	0.0746497	0.44573	0.00157452	0.607088	4.34942	174.596	9.17577	10.9938	1.7033	3.65323	12.578	17.5049	2.69452	18.3764	8.07174	340.443	5.1577	57.8937	1.5976	0.288326	0.286369	0.160921	0.00801396	5.51844	5071.32	0.111432	142.724	5.67019	10.0141	1.24537	5.07444
Roman Sb rec	Tus 065			colourless	2023	area G	10277	vessel non id	non id	20.8485	0.510117	2.00419	68.0396	0.0612884	1.3436	0.512983	5.18026	0.107271	0.0820798	0.544703	0.00213471	0.602902	5.4427	169.858	11.2909	11.0723	2.0992	4.29137	17.0531	20.8996	2.93123	17.5409	14.5618	333.652	5.58874	68.8504	1.96673	0.36874	0.629546	0.189635	0.00716048	6.34092	5036.35	0.269708	165.65	6.97472	12.4839	1.44653	5.89445
Roman Sb rec	Tus 074		1.166	colourless	2024	area G	10306	vessel non id	10th-12th	17.5305	0.573951	2.16497	69.6192	0.0694091	1.09414	0.571328	6.71705	0.075656	0.510264	0.484552	0.0118891	0.392613	8.94304	169.965	15.5253	11.2069	4.44172	6.53255	94.9763	23.4382	3.25395	19.1101	13.3566	443.248	5.96374	46.3953	1.49407	1.35685	0.373642	0.117935	0.00577828	10.5817	3279.7	0.239107	216.6	6.50801	11.064	1.38067	5.63117
Roman Sb rec	Tus 103		2.008	slight bluish tinge	2023	area G	10241	open form non id	non id	18.4884	0.484225	2.11796	69.9613	0.0648525	1.20605	0.531476	5.85151	0.0648081	0.245535	0.399931	0.0027722	0.421821	3.91542	187.526	11.8306	10.4175	2.58497	4.15151	22.1457	18.672	2.71924	22.9403	10.33	362.661	5.41452	41.8931	1.32116	0.680952	0.176134	0.169017	0.00171569	5.76454	3523.69	0.139529	180.887	5.93415	10.2263	1.28659	5.25728
Roman Sb rec	Tus 173 (n=3)			colourless	2023	area G	10259	bowl	2nd-3rd	18.1093	0.495581	2.18393	69.4531	0.0700935	1.16371	0.486582	6.52455	0.064513	0.471508	0.412301	0.00250721	0.382697	3.50629	206.494	11.893	8.49583	4.08553	4.97591	20.0288	21.0789	2.82126	15.2679	9.93811	403.356	5.79991	40.2357	1.31553	0.863138	0.252032	0.0630962	0.0201823	3.83997	3196.87	0.110257	214.867	6.24997	10.7374	1.34419	5.4996
Roman Sb rec	Tus 177 (n=3)			colourless	2023	area G	10259	plate	2nd-3rd	18.6352	0.458364	2.06599	69.6705	0.0775706	1.20778	0.492193	5.9076	0.0634329	0.241722	0.397466	0.00508033	0.614973	3.40886	215.073	11.0993	9.80242	3.0544	4.06651	40.5842	20.9334	2.59246	19.3502	9.9265	354.092	5.55135	44.2257	1.313	0.677306	0.201538	0.095207	0.0370709	8.27475	5137.19	0.11768	163.123	6.0577	10.2767	1.26383	5.37514
Roman Sb rec	Tus 186 (n=3)			colourless	2023	area G	10276	bowl	2nd-3rd	19.2196	0.478149	1.97963	69.6459	0.0497553	1.19416	0.470059	5.61919	0.0704695	0.112467	0.418743	0.00180623	0.586654	3.3198	201.981	8.72673	9.07272	1.79208	3.64933	14.429	19.5363	2.4427	29.3953	8.14858	347.682	5.12946	47.6623	1.45034	0.367692	0.274411	0.151808	0.0134885	3.39959	4900.63	0.0870067	152.01	6.015	10.4921	1.26621	5.19833
Roman Sb rec	Tus 187 (n=3)			colourless	2023	area G	10276	bowl	2nd-3rd	18.8714	0.500637	2.07572	69.622	0.0606599	1.17956	0.515971	5.75839	0.0728723	0.164514	0.441122	0.00229964	0.577248	3.36373	201.002	9.85861	8.63287	2.05031	4.10632	18.3706	19.8867	2.56007	29.1568	10.5473	360.464	5.55043	51.3689	1.51697	0.53464	0.233661	0.155053	0.0156734	4.45225	4822.05	0.0970974	161.396	6.45749	11.0955	1.36331	5.4282
Foy 3.2	Tus 011		2.214	colourless	2023	area G	10239	lamp?	10th-12th	18.1902	0.761363	1.72952	70.1258	0.0256547	1.32325	0.214609	5.7661	0.0959053	0.988786	0.598035	0.00691508	0.00123958	2.86777	186.896	17.9441	11.3828	23.1538	10.682	55.2411	12.8728	3.90536	1.65443	4.49857	427.724	5.88572	51.5638	1.62882	2.1546	0.0348761	0.0288317	0	1.01568	10.3548		334.377	6.03918	10.117	1.31823	5.47306
Foy 3.2	Tus 113			colourless	2023	area G	10259	lamp	4th-5th	16.4343	0.916675	2.1159	69.3711	0.0741639	1.20157	0.483142	6.79543	0.10155	1.01102	1.3072	0.00546488	0.00121679	3.77441	187.157	37.455	13.4703	6.27519	16.7064	43.6562	23.2984	3.83453	8.32014	5.27561	538.308	7.56763	56.1508	1.90683	2.21056	0.145726	0.0399339	0.015382	2.2394	10.1644	0.0595758	194.608	8.19498	11.2643	1.75225	7.18256
Foy 2	Tus 001 body	Fe2+ & Fe3+	2.071	bluish tinge	2023	area G	10180	islamic lamp	10th-12th	16.0965	0.799356	2.53202	68.2507	0.127616	1.03483	0.885958	7.4031	0.129511	1.05489	0.808796	0.0598081	0.287749	12.1144	161.085	23.3822	19.4898	16.7967	10.9725	477.777	44.0609	4.19819	15.4728	24.6253	478.18	7.04359	72.7226	2.09521	2.27809	0.835678	0.140877	0.00750511	108.213	2403.72	0.422781	372.122	7.50053	12.8822	1.59932	6.51844
Foy 2	Tus 001 handle	Fe2+ & Fe3+	1.242	bluish tinge	2023	area G	10180	islamic lamp	10th-12th	16.9429	0.771531	2.57942	68.5955	0.134356	0.894427	0.808453	6.86615	0.118778	0.799934	0.777217	0.112378	0.252876	12.3708	188.688	20.1923	17.9197	14.3651	9.84351	897.733	42.4254	4.33419	12.378	17.5202	437.355	6.44721	66.8665	1.98266	1.99387	0.838247	0.146425	0.00152741	88.5734	2112.41	0.323651	290.417	6.86474	12.0821	1.54243	6.2676
Foy 2	Tus 009		0.443	colourless	2023	area O	2000	window pane	10th-12th	16.9372	0.737123	2.64686	68.0923	0.106551	0.996031	0.678847	7.28992	0.129001	0.955182	0.805627	0.113422	0.204352	5.45426	142.649	23.2421	18.5962	13.5404	10.7788	906.067	54.8313	4.23969	11.685	15.1827	479.191	7.45701	73.4279	2.13384	2.37797	0.660847	0.109798	0	106.479	1707.06	0.268877	343.683	8.15662	13.9233	1.7083	6.94787
Foy 2	Tus 010		1.441	colourless / greyish	2023	area G	10239	goblet with solid stem	10th-12th	16.8569	0.681976	2.37899	69.3572	0.0918735	1.03027	0.595323	6.90452	0.106424	0.855707	0.678685	0.0255689	0.219822	5.90538	172.659	20.2723	15.6543	8.48212	9.04106	204.257	32.0588	4.30225	12.143	14.9331	435.129	6.61094	59.6891	1.8537	2.13254	0.349517	0.0978807	0.0125665	26.3695	1836.29	0.260019	289.638	6.97007	12.0667	1.52013	6.33821
Foy 2	Tus 015		1.213	bluish tinge	2022	area G	10110	lamp?	10th-12th	16.8492	0.736841	2.37952	68.9159	0.106327	0.970564	0.675978	6.97035	0.118779	0.796973	0.804001	0.0810648	0.270208	7.74477	166.222	21.2334	16.9658	10.996	9.46389	647.586	42.8898	4.3225	13.7087	19.7239	445.98	6.69141	67.0325	1.98594	1.93299	0.773536	0.134036	0	87.2288	2257.18	0.476817	320.746	7.41278	12.8338	1.6181	6.50519
Foy 2	Tus 016	Fe2+ & Fe3+	0.801	colourless	2022	area G	10110	lamp?	10th-12th	17.0489	0.860652	2.53118	68.1052	0.121265	0.987256	0.7996	6.94446	0.148436	0.947992	0.865703	0.0991735	0.227647	6.66885	168.802	22.176	23.6823	12.5727	10.3166	792.247	43.4635	4.72637	11.4532	18.1529	450.47	6.92126	81.5343	2.27229	2.21201	1.6008	0.107423	0	77.9641	1901.66	0.297339	308.406	7.62064	13.1715	1.68695	6.87744
Foy 2	Tus 030 body (n=3)			bluish tinge	2024	area G	10455	islamic lamp	10th-12th	17.3396	0.699414	2.63704	68.4484	0.0944422	0.922237	0.675087	7.0143	0.113698	0.7589	0.697971	0.0435937	0.281371	8.80816	174.32	19.8116	15.9161	8.14905	8.82143	348.248	28.5514	4.03069	12.8074	15.0492	453.443	6.77933	65.6892	1.877	1.80782	0.460579	0.0816302	0.00130282	74.7164	2350.44	0.561496	300.731	7.09743	12.3589	1.57323	6.71421
Foy 2	Tus 032 (n=6)			blue	2024	area G	10455	blue and painted window pane	10th-12th	16.1536	0.893412	2.55642	67.5917	0.0738449	1.10251	0.803795	7.27739	0.134756	0.788213	1.52233	0.230281	0.250636	4.72947	181.235	20.6122	19.8072	451.857	49.5244	1839.6	92.5586	5.7111	29.7519	23.5696	459.184	7.10384	74.9836	2.21749	4.74665	0.846981	0.0763498	1.42236	166.527	2093.69	0.739483	307.299	7.74991	13.4957	1.64916	6.80711
Foy 2	Tus 033A body (n=2)		0.579	colourless	2024	area G	10455	islamic lamp	10th-12th	17.0992	0.741753	2.70109	68.2002	0.113349	0.9488	0.672855	7.10416	0.140398	0.888001	0.848313	0.0521733	0.223651	5.90753	167.103	23.6471	17.1322	8.67694	10.0627	416.786	41.1245	4.34205	12.4098	13.8448	451.509	6.9817	76.7158	2.20021	2.05469	0.532344	0.0593458	0	48.3512	1868.27	0.43491	325.167	7.41826	13.4137	1.66972	6.93445
Foy 2	TUS 033A handle			colourless	2024	area G	10455	islamic lamp	10th-12th	15.4959	0.734544	2.96399	67.0419	0.519006	0.756879	0.833311	8.35973	0.143106	0.935067	1.08677	0.411841	0.227876	12.3236	154.113	28.3833	17.9663	13.933	12.4688	3289.99	171.732	5.98768	30.6337	33.9283	473.199	6.88351	72.7471	2.74649	2.49351	336.633	5.98303	2.43429	363.319	1903.57	1.67797	398.84	8.83085	25.9122	2.29145	7.828
Foy 2	Tus 033B	Fe3+		colourless	2024	area G	10455	islamic lamp	10th-12th	16.7249	0.709587	2.66583	67.675	0.118825	0.972668	0.792053	7.05974	0.127431	0.905335	0.782267	0.0969407	0.291042	6.69418	139.746	25.2891	20.3421	9.27372	10.0701	774.41	33.9614	4.26954	13.6463	18.0288	459.849	7.5397	72.0262	2.32415	2.24239	1.34409	0.121371	0	189.399	2431.22	0.495713	344.551	8.48116	14.8183	1.82881	7.33945
Foy 2	Tus 034			colourless	2024	area G	10455	lamp	10th-12th	17.2422	0.76064	2.51503	67.9469	0.11058	1.01431	0.712204	7.1004	0.152508	0.939266	0.871664	0.0869548	0.217972	6.2489	148.555	24.3234	21.0026	12.4057	10.3722	694.639	42.9462	4.15732	11.6476	17.1461	472.508	7.4803	86.4227	2.43317	2.34189	0.757188	0.147145	0.000519788	85.9505	1820.83	0.404271	405.753	8.44825	14.6765	1.77253	7.13086
Foy 2	Tus 036	Fe3+	1.092	colourless	2023	area G	10173	vessel non id	non id	16.2299	0.792441	2.61268	68.4657	0.122738	0.959767	0.753136	7.44159	0.106161	0.950221	0.705097	0.0636078	0.293839	6.61973	159.92	22.9077	15.578	18.9221	10.6288	508.131	44.6433	4.25924	15.0017	14.7504	469.765	6.75184	60.3488	1.88782	2.12379	0.754082	0.121114	0	125.034	2454.59	0.319248	313.987	7.40268	12.7919	1.6146	6.64749
Foy 2	Tus 045	Fe3+	1.914	colourless / greyish	2023	area G	10206	window pane	non id	17.1205	0.688107	2.40081	68.5514	0.0986697	0.975244	0.69146	6.86572	0.119982	0.716184	0.792282	0.150135	0.387364	5.59453	166.205	21.0326	15.5244	25.1986	10.2155	1199.35	59.0689	4.06657	18.3112	22.71	451.15	6.69869	68.2432	2.06797	1.68701	0.763754	0.0951591	0	149.116	3235.85	0.402361	294.97	7.524	13.0394	1.59995	6.51654
Foy 2	Tus 046		1.293	greenish tinge	2022	area G	10123	beaker	10th-12th	17.1108	0.725091	2.53713	67.8177	0.100842	0.922158	0.703138	7.23906	0.147567	0.873143	0.864742	0.204087	0.295571	8.11339	152.01	24.3823	19.5117	15.3232	10.6795	1630.35	43.6038	4.39384	14.5967	19.1704	476.039	7.31485	82.8382	2.33836	2.00497	0.990113	0.120925	0	227.929	2469.06	0.454947	368.049	8.09309	13.9486	1.74025	7.0905
Foy 2	Tus 049A	Fe3+	1.24	colourless / greyish	2024	area G	10447 sud	ribbed bowl	10th-12th	16.8544	0.686668	2.511	69.3289	0.0966086	1.00356	0.648625	6.69854	0.111229	0.752684	0.713605	0.0411814	0.287695	9.05596	169.334	20.3378	15.7409	8.23464	8.79324	328.977	30.9409	4.08536	14.3339	17.7569	435.454	6.68976	64.3003	1.99194	1.76461	0.507586	0.116629	0	61.1866	2403.26	0.758573	289.604	7.73176	13.6643	1.64221	6.74056
Foy 2	Tus 049B	Fe3+	0.642	colourless	2024	area G	10447 sud	ribbed bowl	10th-12th	16.8167	0.698367	2.48707	69.1553	0.0982094	1.01297	0.616935	6.8976	0.114986	0.760657	0.721463	0.0417398	0.300149	10.0976	169.681	20.5378	15.5598	8.35363	8.88238	333.438	32.2229	4.20038	14.6293	17.8935	452.704	6.87749	66.8339	2.00742	1.79224	0.542096	0.102956	0.00583046	64.0152	2507.3	0.775198	303.433	8.16907	14.3532	1.72066	6.97948
Foy 2	Tus 052		1.179	bluish tinge	2024	area G	10442	window pane	non id	16.7636	0.683768	2.52983	69.4641	0.214628	0.951871	0.76744	6.90225	0.0934161	0.589464	0.63298	0.0260969	0.174781	4.88711	157.753	16.8897	12.7824	13.3303	11.3784	208.475	30.7332	3.80496	3.9179	16.5519	413.898	6.55865	56.561	1.83144	1.67666	0.273109	0.0665295	0.0018716	42.88	1460.04	0.279202	222.556	7.45871	12.8279	1.54772	6.41163
Foy 2	Tus 053	Fe2+ & Fe3+	1.679	greenish tinge	2024	area G	10447	bottle	10th-12th	16.8757	0.98628	2.79446	67.5383	0.189378	0.842614	1.01371	6.72198	0.15387	0.804983	1.21289	0.189835	0.292312	10.4045	145.13	24.0098	18.1544	22.1659	13.3991	1516.5	60.3554	4.63762	13.5245	18.9309	433.449	7.54347	97.7678	2.71992	1.98484	0.979315	0.122347	0.0206396	142.652	2441.84	0.477219	301.527	8.82814	15.6569	1.87844	7.5612
Foy 2	Tus 064		1.23	slight bluish tinge	2023	area G	10277	window pane	non id	17.5824	0.658421	2.2819	69.4662	0.171925	0.954736	0.697805	6.12327	0.111799	0.550073	0.671442	0.0197005	0.443627	5.07227	181.059	18.4156	12.2426	10.6279	11.2175	157.378	32.7677	3.72436	8.06638	17.7262	400.005	6.37926	67.4222	2.13263	1.67895	0.310972	0.0882315	0	49.1703	3705.85	0.309819	209.888	7.7114	13.6583	1.63083	6.3998
Foy 2	Tus 066 (n=3)			black	2023	area G	10176	pawn	non id	15.5423	0.530866	2.42999	64.9301	0.181222	0.7598	0.871509	6.22972	0.0849028	0.480577	7.58046	0.0497463	0.134526	4.74576	137.748	14.6905	13.0758	49.0947	39.8631	397.398	36.0543	3.88132	22.6082	24.9264	346.591	5.84153	50.2648	1.62142	1.56827	0.399892	0.112504	0.0052941	65.8787	1123.76	0.470516	205.177	6.38838	11.4354	1.40685	5.81017
Foy 2	Tus 071		0.411	colourless	2024	area G	10455	lamp	10th-12th	17.1799	0.7659	2.56134	67.9909	0.108877	0.973579	0.671685	7.14619	0.149341	0.937072	0.877349	0.084465	0.221861	7.51189	153.412	24.3484	21.7985	12.1785	10.3597	674.749	40.9327	4.30592	12.0485	16.717	469.463	7.467	86.0062	2.33265	2.23904	0.731121	0.142724	0	89.3898	1853.32	0.372282	378.181	8.19239	14.0807	1.76301	7.20141
Foy 2	Tus 072			colourless	2024	area G	10455	islamic lamp	10th-12th	15.6158	0.925408	2.78268	67.5774	0.146629	0.890822	0.873374	7.75638	0.142772	0.950947	0.869195	0.396839	0.254303	7.43847	155.498	24.9255	20.4	11.6987	12.7254	3170.15	46.183	4.88535	12.6596	22.6942	472.844	7.51169	78.7699	2.38406	2.40219	2.09156	0.10693	0	199.748	2124.33	0.54112	344.377	8.77066	15.2247	1.87394	7.62307
Foy 2	Tus 076 (n=2)		0.849	colourless	2022	area G	10100	mould-blow islamic lamp	10th-12th	16.8667	0.668194	2.41125	68.9686	0.113494	1.02318	0.717898	7.12293	0.0954498	0.768808	0.615179	0.087376	0.286127	16.2082	155.543	20.3751	14.1401	8.09397	8.958	698.003	40.5699	3.78866	13.8281	14.7707	461.226	6.67134	59.1125	1.81389	1.87546	0.660265	0.126436	0.00165524	62.7962	2390.16	0.393681	275.154	7.34114	12.7437	1.55047	6.42731
Foy 2	Tus 077 body (n=3)			colourless	2022	area G	10100	islamic lamp	10th-12th	17.0441	0.746623	2.77431	67.849	0.118246	0.915445	0.771548	6.97772	0.143867	0.871465	0.895898	0.195572	0.255586	6.65609	165.891	24.2926	20.4477	14.7659	11.1764	1562.33	63.3076	4.50402	11.7092	21.8163	445.491	7.08086	76.5	2.26103	2.14902	1.34334	0.0646974	0	180.476	2135.04	1.53899	350.16	7.89122	13.7048	1.73323	7.09835
Foy 2	Tus 086		0.773	colourless	2023	area G	10143	stemmed lamp	10th-12th	17.1611	0.70392	2.37957	68.3849	0.123356	1.02597	0.713562	6.9764	0.11354	0.676613	0.762531	0.137253	0.358339	6.21959	167.937	19.7417	16.0155	17.477	10.0921	1096.44	58.0637	3.95913	18.2442	18.9717	456.801	6.71635	65.7742	1.96144	1.87125	0.869988	0.109752	0	112.594	2993.4	0.377775	287.194	7.61062	13.1392	1.61376	6.41677
Foy 2	Tus 093	Fe2+ & Fe3+	1.502	greenish tinge	2022	area G	10113	vessel non id	10th-12th	17.2633	0.755496	2.55509	68.2236	0.115268	1.00362	0.650699	6.93733	0.148449	0.890198	0.873758	0.0714823	0.241233	5.25559	150.077	24.1314	20.7191	10.6844	10.1245	571.036	39.799	4.1143	14.104	13.3163	457.176	7.41291	84.3216	2.4188	2.1757	0.685644	0.0987435	0	61.7697	2015.15	0.303189	363.817	8.56581	14.8049	1.77837	7.19475
Foy 2	Tus 095 (n=3)			bluish	2023	area G	10379	lamp	10th-12th	16.8721	0.745019	2.75774	68.1679	0.096101	0.974869	0.691135	7.1805	0.136776	0.918818	0.880402	0.0750061	0.206792	6.6291	157.893	22.0089	18.1707	13.059	10.4922	599.186	34.1714	4.29639	12.5368	15.0624	454.086	7.17539	76.4884	2.17498	2.32145	0.562373	0.0801198	0	65.0125	1727.44	0.277751	388.002	7.44915	13.5538	1.59933	6.76388
Foy 2	Tus 097			colourless	2023	area G	10335 + 10326	lamp	10th-12th	16.7152	0.909747	2.55126	67.4548	0.181068	0.84368	0.936125	7.67379	0.142262	1.03823	0.89064	0.102627	0.184271	11.8947	166.207	26.7553	19.5424	13.3918	11.1771	819.836	51.5548	4.63425	12.3712	29.0153	526.205	7.31724	81.098	2.30596	2.36152	0.576633	0.118767	0	88.2578	1539.32	0.70953	348.224	8.21652	15.2983	1.75569	7.08449
Foy 2	Tus 098		0.784	colourless	2024	area G	10443	islamic lamp	10th-12th	17.0241	1.08051	3.00025	66.9959	0.191135	0.999306	1.31154	6.31896	0.145892	0.859912	1.36546	0.127373	0.214941	12.1537	140.525	22.8347	20.5636	9.33688	12.1612	1017.52	52.165	4.4437	13.3754	17.5711	430.143	7.2889	98.4248	2.66991	2.3127	0.996876	0.146953	0	133.219	1795.51	0.477797	285.422	8.71999	15.4297	1.81859	7.24573
Foy 2	Tus 098 purple		1.194	purple	2024	area G	10443	islamic lamp	10th-12th	15.5711	1.07855	3.62514	63.7159	0.226758	0.91553	1.54046	6.60726	0.152283	2.47948	2.87282	0.294859	0.332522	15.4336	157.456	27.2345	22.1991	13.3157	20.8096	2355.48	98.6137	6.68464	19.9866	24.997	491.603	9.59707	101.562	2.94683	2.90518	2.1584	0.195624	0	253.178	2777.73	1.24347	438.923	11.0758	20.5243	2.293	9.20733
Foy 2	Tus 099			colourless	2023	area G	10147	lamp	10th-12th	16.8381	0.759465	2.56542	68.7676	0.110268	0.955084	0.755598	6.92661	0.117883	0.779129	0.762619	0.0706738	0.262735	7.00175	160.182	21.3965	17.0527	9.5033	9.11929	564.578	42.4048	4.19707	13.9229	19.605	447.129	6.78684	67.1388	2.0147	1.98404	0.650744	0.095086	0	92.0227	2194.76	0.504518	302.53	7.62213	13.1268	1.63942	6.65373
Foy 2	Tus 147	Fe2+ & Fe3+	1.682	greenish tinge	2024	area G	10472	bottle	10th-12th	16.903	0.954819	2.89116	67.4595	0.191083	0.997947	1.04633	6.66579	0.142094	0.820532	1.08694	0.198129	0.270431	9.44213	134.938	24.3361	18.3331	23.3059	12.9858	1582.75	57.2448	4.4181	12.9857	17.3276	440.331	7.38005	91.6739	2.60582	2.11473	1.30894	0.141312	0.007362	148.618	2259.05	0.457347	292.519	8.44126	15.0183	1.80355	7.25096
Foy 2	Tus 150			colourless	2024	area G	10473	little flask	10th-12th	17.2101	0.72794	2.52969	68.5052	0.104144	1.00808	0.690807	6.85286	0.140373	0.87444	0.812498	0.0609756	0.227842	5.08458	150.776	23.7442	19.5108	9.73454	9.53985	487.103	37.5679	4.03278	12.5185	13.917	451.003	7.03676	78.9888	2.26899	2.14854	0.658952	0.129175	0	55.0774	1903.28	0.303727	333.381	7.84128	13.5721	1.64696	6.79058
Foy 2	Tus 223 body (n=2)			colourless	2024	area G	10451	islamic lamp	10th-12th	16.9135	0.67392	2.49552	69.1698	0.0864816	0.965109	0.68403	6.80031	0.116979	0.773557	0.705841	0.0496156	0.295256	12.9019	165.697	19.9286	12.5009	7.99236	8.72745	396.354	27.8584	4.00178	14.0103	16.3487	441.108	6.91373	68.3653	1.914	1.75496	0.771431	0.0678221	0.000504741	102.089	2466.43	0.958368	292.835	7.23841	12.4407	1.54714	6.48125
Foy 2	Tus 241B (n=3)			colourless / yellowish tinge	2020	tannery	58	lamp	10th-12th	16.7897	1.06356	2.33199	68.0037	0.198636	0.906804	1.40602	7.32032	0.0884692	0.81871	0.673488	0.00844148	0.192756	18.8983	149.301	16.7789	11.186	5.26011	8.74568	67.4348	40.8647	3.23394	9.93777	17.0599	460.343	6.03145	56.1766	1.90867	2.06915	0.269006	0.0987324	0.0425604	9.56479	1610.19	0.375296	223.758	6.47775	11.3048	1.40576	5.81896
Foy 2	Tus 241C (n=3)			colourless / yellowish tinge	2020	tannery	58	lamp	10th-12th	16.8198	1.07878	2.36296	67.8703	0.194969	0.903584	1.3333	7.43125	0.0895425	0.83154	0.684626	0.00842196	0.192464	18.091	148.268	16.8927	11.3163	5.34888	8.81554	67.2788	40.1338	3.25698	9.77886	16.3125	467.91	6.09174	56.7931	1.91005	2.07238	0.292798	0.118163	0.0407115	9.52185	1607.75	0.342777	227.454	6.48562	11.4006	1.42168	5.96969
Foy 2	Tus 256 (n=3)			colourless / greenish	2017	area G	1311	beaker/lamp	10th-12th	17.1265	0.722257	2.49455	68.3891	0.10551	1.01348	0.614711	7.07654	0.131202	0.874323	0.772647	0.101559	0.239219	3.85064	158.875	21.8565	17.914	16.6696	9.82167	811.3	37.3968	3.57278	14.1286	13.2817	456.809	7.21572	76.8585	2.19533	2.25171	0.758591	0.0845408	0.455278	109.695	1998.32	0.246306	315.098	7.95922	13.7999	1.71584	6.89371
Foy 2	Tus 257 (n=3)			colourless / greenish	2017	area G	1311	lamp	10th-12th	16.9132	0.68844	2.42561	69.0355	0.110692	0.992538	0.661572	6.82016	0.12292	0.735481	0.767353	0.0709773	0.297292	3.7787	163.889	20.3268	7.01768	12.6036	9.46315	567.002	39.8982	3.51514	16.6784	15.2294	442.926	7.1434	73.5631	2.17837	1.99589	0.992796	0.102153	0.43591	104.041	2483.43	0.272463	295.122	8.39238	14.397	1.74644	7.09
Foy 2	Tus 258 (n=3)			colourless / greenish	2017	area G	1311	lamp	10th-12th	17.0394	0.714011	2.45431	68.7043	0.103377	1.01036	0.61085	6.95505	0.128405	0.849736	0.761208	0.0999015	0.245654	3.42238	156.856	21.1075	11.2111	14.352	9.68954	798.063	36.2712	3.54284	16.7823	13.681	454.891	7.24241	76.1481	2.21069	2.25109	0.74599	0.0758814	0.431317	103.841	2052.08	0.223059	316.284	8.33479	14.2431	1.73206	7.04973
Foy 2	Tus 261 (n=6)			colourless / greenish	2017	area G	1311	beaker/lamp	10th-12th	16.8478	0.693408	2.52974	68.8393	0.105531	0.978324	0.666304	7.01811	0.12645	0.746529	0.763978	0.0625767	0.290521	4.48795	161.946	19.882	16.1796	13.0199	9.60901	499.894	37.8145	3.48482	16.4525	16.5581	448.111	6.99698	72.4762	2.10562	1.89648	1.15084	0.0856517	0.388078	90.976	2426.87	0.315233	296.039	7.83912	13.4139	1.64866	6.84104
Foy 2	Tus 262 body (n=3)			colourless / greenish	2017	area G	1311	vessel non id	10th-12th	16.8081	0.765601	2.43084	68.8386	0.111602	0.970501	0.708598	6.9973	0.136496	0.931971	0.771386	0.053344	0.194267	4.63195	158.054	22.8505	10.0575	9.82129	10.0477	426.138	55.7757	3.94684	10.7379	13.7325	464.549	7.34611	79.7611	2.24656	2.34718	0.519627	0.0828253	0.235794	57.5381	1622.81	0.297558	402.399	7.77288	13.2555	1.65877	7.00973
Foy 2	Tus 263 (n=3)			colourless / greenish	2017	area G	1311	stemmed lamp	10th-12th	16.5443	0.733172	2.60499	68.7903	0.113315	0.955209	0.661409	6.93986	0.15905	0.822777	0.908763	0.135238	0.241871	5.31319	154.071	25.0313	22.9037	19.2785	11.3409	1080.35	52.5179	3.79504	14.2904	16.7264	453.499	7.74986	92.9398	2.58879	2.17034	0.928736	0.0934913	0.546697	124.931	2020.47	0.374369	432.813	9.18723	15.6864	1.90459	7.77229
Foy 2	Tus 265 (n=3)			colourless / greenish	2023	area G	10150	islamic lamp	10th-12th	16.5522	0.802993	2.64924	68.0287	0.139949	0.898274	0.762165	7.12532	0.131989	0.826338	0.879321	0.206373	0.400235	7.89301	164.742	22.1803	23.342	18.3384	11.6622	1648.61	54.3932	3.70738	22.3463	18.666	450.889	7.11305	74.8762	2.2926	2.17564	1.59357	0.0868596	0.827415	198.194	3343.37	0.414136	318.058	8.20193	14.2091	1.73173	6.96622
Foy 2	Tus 267 (n=3)			colourless / greenish	2023	area G	10150	lamp	10th-12th	16.4164	0.749949	2.50552	68.7538	0.125509	0.943517	0.709429	6.84882	0.15394	0.91608	0.933398	0.184085	0.330209	6.3778	149.4	24.8019	22.1872	19.2646	11.4251	1470.56	57.7965	3.70355	16.9426	18.0292	460.646	7.65677	90.6891	2.59791	2.41071	1.11991	0.0888713	0.727493	172.657	2758.41	0.387168	360.37	9.61774	16.3617	1.97683	7.63999
Foy 2	Tus 271 body (n=3)			colourless / greenish	2017	area G	1321	islamic lamp	10th-12th	17.0112	0.860914	2.67514	67.9055	0.159255	0.927061	0.924239	6.84576	0.136865	0.849799	0.852069	0.170945	0.286062	10.58	164.08	21.1242	19.6767	10.8484	10.4131	1365.59	51.853	3.69279	14.7915	16.0177	446.984	6.92282	85.159	2.30959	1.90482	1.19856	0.0712774	0.65986	155.717	2389.62	0.447074	311.836	7.56561	13.2968	1.64282	6.80824
Foy 2	Tus 271 handle (n=3)			colourless / greenish	2017	area G	1321	islamic lamp	10th-12th	16.2154	0.823869	2.59374	67.4601	0.158406	0.86291	1.0171	6.87428	0.139779	1.84622	1.23837	0.132638	0.273545	9.74874	154.796	24.2209	16.1123	15.6022	11.8217	1059.58	57.6267	4.16034	16.5738	20.8452	472.374	7.91081	87.5183	2.54235	2.71141	0.979894	0.120998	0.538866	128.354	2285.06	1.31727	342.244	9.68207	16.3973	1.95095	7.75046
Foy 2	Tus 272 (n=3)			green	2015	area G	1110	goblet	10th-12th	16.4183	0.63944	2.38369	69.5626	0.115106	0.97287	0.640362	7.17612	0.123321	0.827724	0.667789	0.0391309	0.1932	4.54422	149.033	19.8128	14.3552	10.7803	8.57122	312.597	30.6138	3.29295	11.7158	13.4473	468.893	7.46434	77.6374	2.1574	2.23951	0.460428	0.0966076	0.183979	43.6764	1613.9	0.230152	331.238	8.92397	15.2042	1.79895	7.09986
Foy 2	Tus 278 (n=3)			blue	2015	area G	1132	window pane	10th-12th	15.6865	0.928334	2.53539	68.0408	0.0753377	1.08432	0.681202	7.38418	0.14139	0.800647	1.56798	0.25301	0.142947	3.95028	176.136	21.4587	18.0062	455.336	51.6714	2021.17	532.996	5.5422	30.6558	27.3071	467.657	7.45361	78.8403	2.41504	5.19165	1.20495	0.0680858	1.73367	146.365	1194.11	1.68853	312.452	8.66733	15.0792	1.82648	7.44197
Foy 2 high Sb	Tus 003	Fe3+	0.932	greenish/bluish	2023	area G	10180	vessel non id	non id	16.5276	0.813612	2.75142	66.5241	0.19542	0.768659	0.850526	7.20943	0.127426	0.610263	1.07754	0.881843	0.685734	7.40122	181.663	23.9583	17.2451	38.2573	15.4109	7044.6	154.028	4.77473	31.4822	32.9078	456.397	6.87327	70.9602	2.41905	1.89754	3.5626	0.180503	0	671.478	5728.29	0.818625	344.124	9.06413	16.1868	1.92702	7.78916
Foy 2 high Sb	Tus 023	Cu2+; Fe3+	1.22	bluish	2023	area G	10225	vessel non id	non id	16.9303	0.785108	2.46686	67.6573	0.150676	0.819879	0.772035	6.6063	0.104962	0.672158	0.958795	0.763735	0.739898	8.86503	171.795	19.539	14.6791	13.1546	11.3958	6101.1	126.847	4.28699	30.0423	17.0269	426.781	6.56742	64.3892	2.10016	1.55198	118.333	0.239257	7.65248	409.089	6180.75	0.434234	250.792	7.64595	13.8833	1.65129	6.64149
Foy 2 high Sb	Tus 027	Cu2+; Fe3+	0.989	bluish tinge	2024	area G	10470	stemmed lamp	10th-12th	16.9777	0.710074	2.51027	66.8672	0.148827	1.00786	0.724124	6.3687	0.114714	0.553519	0.940719	1.12369	0.789296	7.02092	179.244	20.2243	14.851	36.8212	13.6193	8976.59	144.422	4.10744	37.2472	18.3113	424.936	6.39117	66.1576	2.16218	1.4633	5.0675	0.19016	0	905.138	6593.4	0.472025	253.333	7.65405	13.772	1.63929	6.50748
Foy 2 high Sb	Tus 028		1.309	bluish	2024	area G	10470	stemmed lamp	10th-12th	16.8404	0.835063	2.56835	65.8989	0.217562	0.985635	0.87028	6.88413	0.140844	0.555564	1.05618	1.03879	0.781755	7.48823	170.77	23.283	18.3724	30.8751	15.4416	8298.4	160.429	4.25614	42.7497	21.5091	470.264	6.81709	74.6562	2.49462	1.62662	5.57754	0.210147	0	779.997	6530.41	0.544314	276.877	8.93361	15.7069	2.12677	7.54521
Foy 2 high Sb	Tus 029 body (n=3)			bluish tinge	2024	area G	10470	islamic lamp	10th-12th	17.0754	0.789632	2.77539	66.5693	0.144549	0.889268	0.776808	6.86615	0.130013	0.658221	1.01279	0.796418	0.592307	6.74264	177.183	22.6606	17.6687	44.939	14.8695	6362.18	117.308	4.51375	28.3509	19.2498	444.189	6.6739	70.5652	2.27672	1.7689	3.76598	0.125112	0	538.257	4947.85	0.564413	288.432	7.7061	13.9886	1.72366	7.11818
Foy 2 high Sb	Tus 029 handle (n=2)			purple	2024	area G	10470	islamic lamp	10th-12th	16.8318	0.817896	2.8109	66.5224	0.163375	0.919055	0.83683	6.87692	0.128118	0.665704	1.05943	0.8156	0.637855	7.27623	182.349	22.1347	17.5897	57.3167	16.1335	6515.42	121.858	4.75761	31.7135	21.6349	444.274	6.97922	73.6221	2.24885	1.80212	3.56483	0.176765	0	594.291	5328.33	0.568006	295.653	7.75609	13.6847	1.71605	7.1722
Foy 2 high Sb	Tus 030 handle (n=3)			turquoise	2024	area G	10455	lamp	10th-12th	16.4389	0.76687	2.66292	64.6874	0.164826	0.895148	0.914219	6.63147	0.123523	0.742264	1.073	3.20325	0.761621	8.16807	178.009	21.0708	16.6888	36.5056	21.5445	25589.1	168.346	4.57823	48.4821	21.4082	438.643	6.76262	69.4866	2.21372	1.63231	21.7684	0.209788	0	673.34	6362.21	0.694615	283.305	7.79612	14.4692	1.71462	7.02973
Foy 2 high Sb	Tus 054	Fe3+	1.622	colourless / greyish	2022	area G	10110	lamp	10th-12th	16.823	0.694388	2.43803	67.2887	0.0959038	0.981065	0.615456	6.86467	0.134761	0.743625	0.837754	0.108338	0.53497	5.60735	165.453	22.5999	18.9408	17.1662	9.07586	865.461	34.8644	4.10062	23.0722	15.0907	435.62	6.84009	77.3268	2.16776	2.0583	3.30141	0.119504	0	221.401	4468.89	0.293537	293.087	7.32335	12.726	1.55864	6.33573
Foy 2 high Sb	Tus 068			slight bluish tinge	2024	area G	10455	stemmed lamp	10th-12th	16.9265	0.752525	2.54395	66.7837	0.163206	0.97488	0.775394	6.50741	0.119248	0.585041	0.934987	1.07385	0.80137	6.63	181.414	21.8715	16.9983	37.7982	14.115	8578.44	167.749	4.17245	35.7472	19.5416	435.105	6.50173	68.8355	2.20672	1.5774	4.74144	0.176509	0	766.51	6694.26	0.488319	253.166	7.79931	13.4786	1.63447	6.45002
Foy 2 high Sb	Tus 077 handle (n=2)			blue	2022	area G	10100	lamp	10th-12th	16.1344	0.693231	3.00251	67.4483	0.129481	0.773304	0.88227	6.93853	0.117097	0.65046	1.334	0.209713	1.21157	6.05863	166.606	21.2228	18.0053	470.969	26.7818	1675.29	58.5778	5.78162	30.3404	25.1136	432.465	7.09117	63.7307	2.15705	2.4625	1.14202	0.243918	0.370404	107.122	10120.9	2.78237	275.94	8.86952	15.3743	1.92326	7.72888
Foy 2 high Sb	Tus 091 (n=2)			bluish			10327	stemmed lamp	10th-12th	16.1899	0.68803	2.77138	66.9517	0.153743	0.791445	0.673521	7.16385	0.0973252	0.452742	1.29426	0.970254	0.656633	5.77765	155.457	20.531	14.6421	24.2756	13.7163	7750.87	81.4908	4.40259	36.8848	26.2984	449.589	6.95005	53.522	2.1408	1.11487	5.47077	0.174546	0	682.864	5485.2	0.907595	251.619	9.42344	16.7709	1.97168	7.73059
Foy 2 high Sb	Tus 096	Cu2+; Fe3+	0.4	bluish	2023	area G	10379	stemmed lamp	10th-12th	16.2985	0.648261	2.61491	67.3576	0.132137	0.866322	0.743222	7.05044	0.0875263	0.437598	0.949172	1.14884	0.660772	6.05522	148.825	17.7322	14.371	20.5819	12.1657	9177.5	73.5499	3.92321	36.1034	24.7931	450.13	6.60002	48.6111	1.9187	0.979061	5.10913	0.135028	0	691.835	5519.77	0.71585	237.741	8.36671	14.5334	1.7272	6.81116
Foy 2 high Sb	Tus 100 (n=6)			green (emerald?)	2023	area G	10241	grozed window fragment	10th-12th	16.5682	0.821898	2.64631	63.847	0.196469	0.841935	1.06288	6.59027	0.121934	0.587563	1.14069	3.33112	0.749327	16.4392	186.4	21.2097	16.5107	52.112	22.7036	26610.6	2409.79	4.10752	57.4753	23.1164	435.722	6.47897	69.4497	2.307	1.70475	28.6369	0.197219	2.53733	1031.74	6259.52	1.6145	275.256	7.97832	14.0233	1.71697	7.11534
Foy 2 high Sb	Tus 223 handle (n=2)			blue	2024	area G	10451	lamp	10th-12th	16.0393	0.793256	2.57924	63.9676	0.165899	1.00177	0.755939	6.69129	0.150796	3.70761	1.92167	0.719388	0.604037	7.53231	194.48	30.1918	15.5435	26.2566	20.8341	5746.83	142.463	5.96278	30.999	19.824	644.622	9.34051	84.4838	2.35429	3.30083	3.8311	0.178465	0	567.669	5045.84	2.57635	459.595	7.8722	14.1176	1.71868	7.14602
Foy 2 high Sb	Tus 254 (n=3)			greenish blue	2017	area G	1311	stemmed lamp	10th-12th	16.7091	0.72848	2.47642	67.0806	0.157981	0.924529	0.806446	6.77078	0.11478	0.537776	1.09918	0.766605	0.940826	7.45931	170.085	18.653	12.4997	180.38	20.4569	6124.02	171.153	4.07502	40.1923	16.2706	430.069	6.87186	70.9747	2.66934	2.12921	3.50309	0.205961	3.19839	736.536	7859.21	0.344797	266.597	8.30557	14.7503	1.7216	6.97806
Foy 2 high Sb	Tus 255 (n=3)			greenish blue	2017	area G	1311	stemmed lamp	10th-12th	16.0263	0.891678	2.6819	65.561	0.193163	0.924998	0.793784	7.155	0.140968	0.709305	1.39225	0.961265	0.637658	4.48679	157.923	22.7832	12.6014	101.707	40.0657	7679.06	801.186	4.11403	87.2962	14.94	480.425	7.44241	77.5169	2.539	2.11729	4.51661	0.22403	5.69826	1305.42	5326.69	0.358663	280.401	9.19762	15.7762	1.904	7.70739
Foy 2 high Sb	Tus 262 trail (n=3)			colourless / greenish	2017	area G	1311	stemmed lamp	10th-12th	16.6516	0.631489	2.28008	68.0134	0.130291	0.864178	0.673568	6.72716	0.093454	0.521151	1.04279	0.250259	1.58148	5.42247	165.721	16.0192	7.31665	478.658	28.2795	1999.19	71.069	4.60088	41.9202	12.7935	422.658	6.34827	56.1917	1.8513	2.63702	1.1665	0.305102	1.05573	143.566	13210.9	0.260127	243.374	7.0208	12.2457	1.52587	6.14181
Foy 2 high Sb	Tus 269 (n=3)			greenish aqua	2017	area G	1311	stemmed lamp	10th-12th	16.0565	0.621214	2.42269	68.1239	0.12679	0.900733	0.654556	7.04283	0.0852153	0.407136	0.829325	1.16379	0.709341	5.3986	151.48	16.3706	10.7008	23.0935	11.2903	9296.93	67.2316	3.32126	39.7962	20.4226	447.035	6.87718	50.4292	1.883	1.0438	5.44926	0.179153	2.85983	699.215	5925.5	0.586169	231.936	8.86312	15.5657	1.79233	7.1666
Foy 2 high Sb	Tus 269 (n=3)			greenish aqua	2017	area G	1311	stemmed lamp	10th-12th	15.9696	0.627254	2.39424	68.1244	0.1304	0.898264	0.67795	7.09112	0.0852303	0.420279	0.789555	1.18351	0.660958	5.67836	150.772	16.6391	11.8024	19.694	11.7496	9454.45	74.9105	3.37273	38.8514	21.4881	452.396	6.78803	48.627	1.87885	1.00728	5.26876	0.150578	2.91095	715.973	5521.33	0.566418	237.041	8.73713	15.1234	1.79551	7.17864
Foy 2 high Sb	Tus 275 (n=3)			greenish aqua	2015	area G	1110	stemmed lamp	10th-12th	16.724	0.873289	2.48211	65.9407	0.200888	0.916391	0.750386	6.30376	0.150565	0.798309	1.18627	1.50397	0.540167	4.34161	175.61	23.3313	11.5016	17.3341	17.0554	12014.5	209.461	3.65568	32.7124	16.628	429.626	6.88275	87.9784	2.67597	2.17918	8.13813	0.333262	4.82822	1145.77	4512.29	0.404773	294.055	8.77014	15.4281	1.77456	7.1955
Foy 2 with some HIMT	Tus 012		0.538	colourless	2023	area G	10239	bowl	2nd-3rd	17.003	0.863175	2.58482	67.3863	0.0962067	0.994432	0.73689	7.0009	0.177492	1.06425	0.991126	0.202877	0.239648	9.51775	152.587	29.7524	23.3066	23.2459	14.2449	1620.68	80.2753	4.50164	16.2965	22.0316	485.755	7.71175	97.17	2.68441	3.01222	1.53949	0.132343	0	348.371	2001.91	1.87599	339.623	9.61463	15.7445	1.97406	7.76695
Foy 2 with some HIMT	Tus 073		0.506	colourless	2024	area G	10455	lamp	10th-12th	17.024	0.86233	2.60261	67.9688	0.120327	1.01598	0.743333	6.88396	0.16977	1.02043	0.949928	0.0833092	0.215997	8.08689	165.176	26.2533	23.6383	12.787	11.7628	665.516	46.586	4.59213	11.9606	17.9714	462.987	7.45406	93.6506	2.6006	2.51672	0.798249	0.104972	0	81.3852	1804.33	0.453358	380.817	8.34361	14.2959	1.74985	7.16047
Foy 2 with some HIMT	Tus 087			colourless	2023	area G	10143	lamp	10th-12th	17.3942	0.782415	2.52647	68.2156	0.0903005	0.92248	0.674989	6.59347	0.177547	0.993037	0.907446	0.096282	0.273981	5.21754	166.487	26.3314	23.8605	18.6786	10.9255	769.148	44.5697	4.30772	14.6971	11.9718	457.618	7.16694	98.7864	2.51238	2.38805	0.865481	0.0950752	0	150.988	2288.71	0.192611	397.684	7.6637	13.1927	1.62648	6.71333
Foy 2 with some HIMT	Tus 264 (n=3)			colourless / greenish	2023	area G	10150	islamic lamp	10th-12th	17.143	0.733331	2.48719	68.4178	0.0975881	1.01096	0.600599	6.88521	0.158412	0.831717	0.86656	0.102372	0.291398	5.13906	164.253	23.874	9.89725	9.68753	10.3328	817.795	38.6453	3.59372	18.9973	13.1838	460.895	7.56454	93.7619	2.53828	1.93426	1.63557	0.101693	0.738676	180.521	2434.2	0.24855	296.383	8.77003	14.561	1.81001	7.26281
Foy 2 with some HIMT	Tus 266 (n=3)			colourless / greenish	2023	area G	10150	lamp	10th-12th	17.497	0.777959	2.60753	67.5092	0.099997	1.00058	0.576241	7.01214	0.179929	1.05104	0.946301	0.0957846	0.233981	5.12287	170.692	27.1021	21.6504	20.1423	12.6765	765.175	80.496	3.76268	11.5318	10.8276	467.725	7.56296	101.105	2.61142	2.43284	1.09772	0.0803278	0.449258	110.273	1954.56	0.216909	444.202	7.80622	13.3054	1.74996	7.05058
Foy 2 with some HIMT	Tus 268 (n=3)			colourless / greenish	2023	area G	10150	beaker/lamp	10th-12th	16.1133	0.745569	2.64749	69.0045	0.114336	0.876638	0.675179	7.02138	0.178871	0.980226	0.972625	0.11448	0.218089	4.80428	142.271	25.9635	25.5542	11.5529	10.6727	914.521	48.5842	3.62164	12.5641	16.5705	478.444	8.1502	117.479	2.86198	2.29088	0.979514	0.0597905	0.346348	85.2344	1821.81	0.361352	398.529	9.72114	16.8093	1.98784	8.03776
Foy 2 with some HIMT	Tus 075 (n=3)			olive green	2022	area G	10100	olive window pane with cutted edges (grossarium)	10th-12th	16.694	0.874156	2.72339	64.5738	0.114306	0.946016	0.686972	7.82559	0.188815	1.5422	2.18182	0.160376	0.296086	8.43601	177.447	29.4703	23.5192	22.5107	20.1518	1281.17	95.3801	5.18699	18.1835	15.466	466.478	8.40944	105.38	2.67696	3.22896	5.54556	0.116937	0	957.886	2473.36	1.28435	443.396	8.60513	14.1257	1.88031	7.9381
Foy 2 with some HIMT	Tus 024 (n=2)	Fe3+	1.758	greenish tinge	2023	area G	10225	vessel non id	non id	16.8285	1.23251	3.16808	67.3415	0.222138	1.02229	1.29237	5.82976	0.205624	0.78336	1.46579	0.106104	0.193222	13.3227	133.37	27.0727	22.2979	21.5464	14.2033	847.614	54.1052	5.40481	11.8415	18.2399	397.052	8.28306	139.396	3.53906	1.68345	0.790242	0.164696	0.0559734	95.8477	1614.09	0.573264	278.94	9.96284	18.4094	2.13104	8.62791
Foy 2 with some HIMT	Tus 031 handle (n=2)			bluish tinge	2024	area G	10455	islamic lamp	10th-12th	16.966	0.87424	2.77719	67.5963	0.0950955	0.936247	0.667442	6.95596	0.213712	1.2762	1.06238	0.0816301	0.162429	6.65931	168.066	29.364	27.2401	13.4935	12.1673	652.102	37.9319	4.81055	9.16077	14.92	472.589	7.78215	115.817	2.8716	2.75444	0.643689	0.0734716	0.00892591	73.569	1356.86	0.320707	464.592	7.98373	13.9964	1.75714	7.39598
Foy 2 with some HIMT	Tus 031 body (n=2)			bluish	2024	area G	10455	lamp handle	10th-12th	16.9317	0.876012	2.73289	67.6147	0.112768	1.01975	0.692184	6.97351	0.189571	1.14111	1.04013	0.0848193	0.210953	7.30731	169.039	27.3567	21.1432	12.7168	12.0228	677.579	43.087	4.68101	11.4832	15.5287	465.937	7.69324	104.566	2.63084	2.54914	1.7951	0.0623753	0.000102923	85.6202	1762.2	0.356322	400.23	8.07709	13.8214	1.74903	7.24793
Foy 2 with some HIMT	Tus 078		1.575	greenish bluish	2022	area G	10100	bottle	10th-12th	16.7527	1.13288	3.05029	67.0993	0.208833	0.974777	1.12614	6.53485	0.190404	0.81813	1.32905	0.149223	0.254866	13.1367	136.799	26.8843	21.9699	25.2333	13.9771	1192.07	58.4202	5.05041	14.0201	20.8618	433.405	8.42441	124.091	3.31612	1.8832	0.896231	0.097458	0.0368321	118.026	2129.02	0.799637	323.355	10.1863	18.2959	2.12991	8.56277
Foy 2 with some HIMT	Tus 085			colourless	2023	area G	10143	beaker/lamp	10th-12th	17.5226	0.79814	2.54499	68.1441	0.0895186	1.03612	0.675093	6.30988	0.210593	0.994624	1.13407	0.0492562	0.218035	6.9324	168.77	32.3816	29.1606	12.7718	12.3648	393.483	43.0481	4.5084	13.1219	15.1374	430.848	7.77877	115.05	2.83868	2.235	0.431349	0.107961	0.0110705	51.7797	1821.36	0.310611	374.456	8.44836	14.1263	1.81223	7.29257
Foy 2 with some HIMT	Tus 240 (n=3)			olive green	2020	tannery	58	biconical beaker	10th-12th	16.3319	1.34145	3.43717	66.8415	0.233186	0.95078	1.28107	6.33454	0.21538	0.800388	1.55076	0.12787	0.231748	11.9314	131.793	27.8246	23.1725	31.2766	15.0201	1021.49	59.8755	4.92296	15.2086	20.164	409.544	8.88781	135.807	3.91322	1.68515	0.99538	0.105368	0.561359	116.104	1935.91	0.673956	287.617	11.4391	21.2163	2.38267	9.60913
Foy 2 with some HIMT	Tus 270 (n=3)			colourless / greenish	2023	area G	10150	beaker/lamp	10th-12th	16.7501	0.731795	2.47835	68.9328	0.117415	0.988352	0.639113	6.68023	0.180603	0.946196	0.952187	0.0723272	0.241544	5.31314	155.668	25.6919	21.8368	13.6049	10.7064	577.786	43.9116	3.54771	14.251	17.234	454.407	7.787	106.157	2.81071	2.40753	0.666315	0.0800827	0.315919	73.8061	2017.74	0.3145	366.706	9.40475	16.0508	1.93925	7.73591
Foy 2 with some HIMT	Tus 276 (n=3)			green	2015	area G	1110	islamic lamp	10th-12th	16.5278	1.0973	3.02773	67.6714	0.201058	1.0269	1.19303	6.31086	0.190276	0.753661	1.23069	0.12035	0.315207	9.20546	129.378	24.6834	19.8495	38.4086	13.3349	961.415	57.0185	4.30494	16.5884	16.4217	418.656	8.50161	133.411	3.52523	1.78069	0.813049	0.14586	0.495674	110.063	2633.09	0.422744	296.018	10.926	19.7779	2.26524	8.82649
outliers	Tus 021 (n=4)	Fe2+ & Fe3+	3.079	bluish	2023	area G	10259	bottle	non id	18.6799	0.901988	2.36702	67.9347	0.130934	1.12395	0.695989	6.83173	0.139531	0.062981	0.761675	0.00226863	0.175993	5.85075	246.922	11.9013	15.2198	2.32491	5.03034	18.123	22.814	3.01358	7.17032	5.94025	527.551	6.27063	88.6591	2.5128	0.391144	0.191638	0.0511908	0.011346	2.31771	1470.16	0.060535	142.665	6.71338	12.2995	1.50178	6.2078
outliers	Tus 083 (n=4)	Fe2+ & Fe3+	3.062	bluish tinge	2022	area G	10126	bottle	non id	18.8034	0.871928	2.37902	67.8766	0.120766	1.15925	0.697102	6.77134	0.139663	0.0589905	0.755692	0.00216963	0.173835	5.41852	245.167	11.8425	15.8406	2.29913	5.00091	17.3321	21.7081	2.96718	7.05283	6.01665	522.955	6.19024	87.52	2.48985	0.375555	0.201928	0.0585675	0.0112136	2.21425	1452.13	0.0577794	140.79	6.62669	12.1077	1.49138	6.13197
outliers	Tus 084 (n=4)		1.856	slight bluish tinge	2022	area G	10126	bottle	non id	18.5715	0.869221	2.32057	68.0712	0.125773	1.22944	0.679334	6.80523	0.142199	0.0579805	0.756022	0.00216462	0.181621	5.65503	241.505	12.0821	12.9694	2.25981	4.86584	17.292	22.6634	3.05465	7.63126	6.03591	526.356	6.62981	92.6837	2.6567	0.387251	0.148776	0.0657386	0.0121929	2.24185	1517.18	0.076628	143.488	7.79563	14.1405	1.65721	6.61649
outliers	Tus 090 (n=4)	Fe2+ & Fe3+	1.83	bluish tinge	2023	area G	10205	vessel non id	non id	18.6154	0.881541	2.32111	68.094	0.12555	1.20075	0.67217	6.76409	0.140789	0.0595436	0.754124	0.00213084	0.180194	5.37958	241.483	12.0994	14.204	2.26597	4.93648	17.0222	22.454	3.04346	7.35406	6.04929	525.722	6.42148	90.2828	2.55468	0.378783	0.157201	0.0544316	0.00977904	2.27741	1505.26	0.0603139	141.772	7.01334	12.8096	1.54243	6.29385
outliers	Tus 056 (n=3)	Fe3+		colourless	2022	area G	10110	window pane	non id	16.2903	0.466094	3.86914	69.1203	0.271929	0.76684	1.03644	6.2625	0.0816018	0.226008	0.435777	0.00124952	1.03802	3.83538	149.452	10.4779	39.0545	3.3651	8.83391	9.98178	20.6865	3.95945	11.9748	16.0766	240.912	6.46694	56.2548	1.82032	0.317898	0.0633791	0.172905	0.00390547	1.10124	8671.11	0.134289	238.781	6.21698	10.547	1.30245	5.18568
Plant ash	Tus 004	Fe3+		amber tinge	2023	area G	10135	casted ribbed bowl	10th-12th	16.5454	2.04053	3.07506	64.8555	0.428361	1.19228	2.64589	6.17527	0.230939	0.963925	1.68097	0.00183974	0.000221213	22.4873	88.3399	26.4286	21.7171	5.02925	13.2013	14.6968	43.8198	6.24767	5.82221	18.0801	401.707	8.94162	226.696	4.71154	2.7455	0.190968	0.0933045	0.00655228	1.79941	1.84791	0.381895	193.939	11.5755	21.6227	2.47919	9.79298
Plant ash	Tus 039	Fe3+		amber tinge	2015	area R	5208	vessel non id	10th-12th	17.2703	2.42473	3.87338	64.3113	0.333813	1.08711	2.20647	4.55699	0.306323	1.10982	2.33914	0.00276765	0.000541203	28.0245	102.948	29.2607	26.5936	6.36958	17.344	22.1094	57.48	6.92392	2.42649	22.0791	388.218	10.5296	224.7	5.69488	0.738488	0.149669	0.171938	0.0122909	1.82803	4.52095	0.836653	222.336	13.995	26.8904	2.95135	11.4686
Plant ash	Tus 048	Fe3+		amber tinge	2024	area G	10447 sud	prunted beaker	12th	13.2002	3.28277	3.2386	63.4934	0.860882	0.786774	2.65408	10.1368	0.121856	0.845476	1.17562	0.00369493	0.000593992	78.6564	160.844	17.9282	14.1778	5.99941	9.51215	29.5169	73.6454	5.05798	3.3514	13.6462	600.827	6.05033	70.6761	3.60977	1.96787	0.0875882	0.101616	0.0457013	2.0281	4.96193	0.374691	186.991	8.67266	16.1313	1.81156	7.04424
Plant ash	Tus 069			colourless/ amber tinge	2024	area G	10455	islamic lamp	10th-12th	16.9069	1.69135	4.23067	64.7076	0.378564	1.24403	2.65917	4.79566	0.314026	0.936474	1.93227	0.0297724	0.000121291	19.5668	81.2661	30.2837	25.8907	14.0583	14.4211	237.837	55.8247	6.80396	3.37009	22.9273	304.811	11.6125	302.338	6.45961	0.890569	0.257989	0.132954	0.120287	6.19855	1.01321	0.594261	245.853	15.1451	28.3285	3.21958	12.2679
Plant ash	Tus 070			colourless/ amber tinge	2024	area G	10455	lamp?	10th-12th	16.9183	1.69229	4.14612	64.7173	0.377588	1.23077	2.63149	4.85344	0.318527	0.946494	1.96361	0.0297115	0.000112433	20.1037	79.5252	30.8743	25.8224	14.1958	14.6538	237.35	58.406	6.87156	3.44815	23.2742	309.002	11.518	298.562	6.56863	0.881475	0.272056	0.125736	0.129976	5.99828	0.939209	0.605069	250.316	15.5056	28.8069	3.23129	12.4949
Plant ash	Tus 124			amber tinge	2023	area G	10242	jug or bottle	2nd-3rd	18.3563	2.2257	3.66243	63.7015	0.31107	1.04853	2.09015	4.25073	0.310533	1.40374	2.46157	0.00193326	0	10.7825	93.3416	30.0323	27.2514	6.34385	17.6598	15.4438	53.7701	6.5441	2.05858	11.6052	433.294	10.766	238.39	5.25895	0.734328	0.134528	0.111247	0.0141443	1.39077		0.727429	240.706	12.3675	23.5543	2.61407	10.3043
Plant ash	Tus 146			amber tinge	2024	area G	10472	lamp	10th-12th	19.7721	1.96861	3.89419	63.9531	0.344611	1.40264	1.9753	2.94174	0.334114	0.769897	2.48248	0.00199433	0	10.1984	73.8159	30.6096	29.5456	6.45019	18.4031	15.9317	51.5583	6.14171	1.99585	14.934	262.786	12.0777	292.817	5.67049	0.770831	0.152423	0.105713	0.0178648	1.60691		0.348328	241.77	13.4695	25.0748	2.80436	11.3761
Plant ash	Tus 237 (n=3)			yellowish green	2020	tannery	58	beaker/lamp	10th-12th	16.4214	1.90108	4.42195	65.6775	0.389788	1.09245	2.26476	4.08893	0.382301	0.876134	2.27842	0.0112277	0.00207319	10.1359	68.6543	42.4206	27.1629	9.65439	16.9697	89.6921	64.2192	6.55119	4.44234	24.8487	336.613	12.3206	285.017	8.09347	6.34238	0.257579	0.403649	0.161245	17.3455	17.3184	0.510254	397.244	17.2383	31.6829	3.44363	13.4426
Plant ash	Tus 238 (n=3)			yellowish green	2020	tannery	58	beaker/lamp	10th-12th	16.3796	1.86659	4.55451	63.7603	0.51552	1.1658	2.64732	5.52665	0.320125	0.940617	2.10391	0.0113568	0.000357586	14.3044	77.4529	38.8333	32.7313	35.824	16.2085	90.7235	62.5341	6.64524	6.28122	25.9224	406.779	11.474	255.04	8.6967	6.15476	0.289486	0.578977	0.0247792	3.06314	2.9871	0.669665	455.947	16.7194	31.1491	3.38292	13.1222
Plant ash	Tus 241A (n=3)			colourless / yellowish tinge	2020	tannery	58	vessel non id (engraved)	10th-12th	14.3066	4.15049	2.21923	65.2372	0.385192	1.00259	1.54179	9.07758	0.107728	0.667688	1.02943	0.00406142	3.26274e-05	20.0054	172.494	15.2639	11.4946	3.54628	8.21036	32.4447	61.3273	3.25005	1.7895	14.287	983.013	5.24332	86.4149	2.96074	2.819	0.272581	0.13523	0.0216818	3.05663	0.272553	0.576917	147.921	7.7526	14.3867	1.5907	6.37617
[truncated: 17 more columns]

## Sheet: standards
LA-ICP-MS data of the reference glass, giving the precision and accuracy in terms of the certified values wt% oxides and element ppm for traces
	B2O3	Na2O	MgO	Al2O3	SiO2	P2O5	Cl	K2O	CaO	TiO2	V2O5	MnO	Fe2O3	CoO	NiO	CuO	ZnO	Rb2O	SrO	ZrO2	Ag	SnO2	Sb2O3	BaO	PbO	Li	B	V	Cr	Co	Ni	Cu	Zn	Ga	As	Rb	Sr	Y	Zr	Nb	Mo	Ag	Cd	In corr ppm	Sn	Sb	Cs	Ba	La
Corning A	0.2252	13.9588	2.55652	0.989363	67.1313	0.103453	0.124492	2.792	5.44679	0.721408	0.00628821	1.01747	1.11245	0.168174	0.0228293	1.16177	0.0540289	0.00953593	0.101641	0.00513016	0.00155415	0.165823	1.5925	0.445715	0.0638306
Corning A	0.222213	13.9908	2.56147	0.935565	67.0041	0.103835	0.11248	2.81025	5.49845	0.735675	0.00636965	1.02852	1.12633	0.168719	0.0231684	1.16879	0.0558492	0.00969835	0.104627	0.00529891	0.00154695	0.166929	1.61732	0.455905	0.0645581
Corning A	0.216936	13.9495	2.56266	1.05148	66.9908	0.114281	0.127133	2.81572	5.45826	0.728468	0.00631332	1.01747	1.11146	0.168352	0.0228874	1.16535	0.0542653	0.00956591	0.103176	0.00522474	0.00154516	0.166116	1.61605	0.450313	0.0632476
Corning A	0.214621	13.9718	2.54317	0.914302	66.9826	0.112866	0.110366	2.83355	5.51483	0.739684	0.00651146	1.02543	1.12626	0.168291	0.0231258	1.16601	0.0570138	0.00980802	0.105265	0.00538505	0.00153392	0.168524	1.65188	0.460052	0.0651285
Corning A	0.210194	13.984	2.58132	1.00468	66.8813	0.1148	0.126102	2.82585	5.49091	0.742917	0.00644712	1.02535	1.1215	0.168071	0.0229655	1.16943	0.0553002	0.00969509	0.104819	0.00534975	0.00154093	0.167508	1.63936	0.456031	0.0634262
Corning A	0.203341	13.989	2.5637	0.912477	66.9001	0.100601	0.111956	2.8525	5.51672	0.753376	0.00660806	1.03051	1.12926	0.169016	0.0231853	1.16739	0.0581115	0.00981923	0.106293	0.00546159	0.00154032	0.167905	1.67477	0.46335	0.0627391
Corning A	0.207594	13.9324	2.55694	1.02787	67.034	0.116145	0.13386	2.83546	5.42039	0.738658	0.00644775	1.01495	1.10581	0.166633	0.02273	1.15916	0.055221	0.00967021	0.104071	0.00526008	0.00154748	0.166743	1.64289	0.450717	0.0630754
Corning A	0.205844	13.9269	2.5482	0.991544	66.8978	0.110977	0.126687	2.87199	5.51354	0.748972	0.00651827	1.0231	1.1135	0.167084	0.0228567	1.16053	0.0578068	0.00974299	0.105754	0.0054055	0.00152344	0.167305	1.67312	0.459877	0.0627828
Corning A	0.192524	13.966	2.59736	0.904328	66.7438	0.119647	0.128447	2.87394	5.52519	0.778286	0.00674059	1.03308	1.12631	0.169105	0.0230878	1.1781	0.0581316	0.00998134	0.107512	0.00550755	0.00154666	0.170661	1.72698	0.47145	0.0622935
Corning A	0.211793	13.9672	2.58377	0.954197	66.7052	0.10704	0.129327	2.83118	5.75053	0.730092	0.00638588	1.03212	1.12911	0.170334	0.0228526	1.18773	0.0505194	0.00951786	0.104345	0.00529664	0.00152074	0.168486	1.60805	0.452548	0.0607611
Corning A	0.205951	13.8462	2.57314	0.943793	66.8172	0.113849	0.123827	2.82053	5.76628	0.736754	0.00639799	1.02658	1.12303	0.167812	0.022723	1.18169	0.0519493	0.00947937	0.103955	0.00534156	0.00151849	0.168532	1.65192	0.451994	0.0602199
Corning A	0.196211	13.7506	2.54145	0.932193	66.9919	0.112694	0.123187	2.83555	5.75527	0.742116	0.00649176	1.01781	1.11926	0.166031	0.0222812	1.16218	0.0523195	0.00948507	0.10409	0.00542031	0.0014931	0.167013	1.65253	0.454087	0.0591762
Corning A	0.207269	13.9389	2.55658	0.933125	66.7536	0.10981	0.119876	2.82202	5.7981	0.737968	0.00640031	1.03329	1.11194	0.166461	0.0229373	1.17311	0.051295	0.00951636	0.103504	0.00519907	0.00151311	0.166883	1.63935	0.451195	0.0604503
Corning A	0.207681	13.8032	2.53927	0.928414	67.0001	0.11211	0.123458	2.82223	5.73838	0.738528	0.0063883	1.0132	1.09964	0.164467	0.0227079	1.15709	0.0520593	0.00946172	0.102901	0.00525797	0.00151817	0.166977	1.65704	0.448066	0.0601341
Corning A	0.197815	13.7573	2.47202	0.899563	67.0893	0.114955	0.126169	2.83466	5.76358	0.753168	0.0064365	1.00671	1.08758	0.162952	0.0224977	1.14077	0.0520475	0.00950734	0.103898	0.00535356	0.00151342	0.167677	1.6906	0.455298	0.0590936
Corning A	0.206893	13.8353	2.57916	0.931861	66.8145	0.115966	0.132525	2.82795	5.86096	0.741328	0.00628426	1.0203	1.12737	0.169433	0.0233345	1.16887	0.0560259	0.00951099	0.103312	0.00548849	0.00155731	0.165042	1.56882	0.448199	0.0609005
Corning A	0.210998	13.7945	2.60018	0.930064	66.6713	0.121344	0.121296	2.8233	5.93871	0.750393	0.00634466	1.02374	1.12687	0.169838	0.0234799	1.18277	0.0578035	0.00967377	0.10473	0.00557814	0.00159842	0.168138	1.62374	0.452556	0.0628164
Corning A	0.208088	13.7168	2.58459	0.916038	66.722	0.12146	0.111198	2.80791	5.97992	0.758472	0.00642395	1.02604	1.12838	0.168748	0.0232751	1.16497	0.0583613	0.00959201	0.104752	0.00562096	0.00159496	0.17034	1.66786	0.458121	0.0613476
Corning A	0.200752	13.5253	2.51806	0.898571	67.114	0.121015	0.125432	2.81382	5.8904	0.758649	0.00640451	1.00767	1.10808	0.165645	0.0227043	1.14503	0.0579839	0.00954249	0.104991	0.00567546	0.00159382	0.169833	1.68645	0.461401	0.0625581
Corning A	0.192361	13.3194	2.44699	0.880735	67.4635	0.121831	0.133911	2.84136	5.83715	0.768	0.00646834	0.987765	1.08904	0.160717	0.0220361	1.11825	0.0578995	0.00951151	0.105356	0.00585011	0.00159687	0.170243	1.71338	0.465662	0.0625978
Corning A	0.211611	13.8165	2.57338	0.913017	66.9164	0.123691	0.12278	2.74565	5.83784	0.752647	0.00643139	1.01475	1.11173	0.169002	0.0234372	1.16282	0.058285	0.00959918	0.103351	0.00555027	0.00155506	0.167114	1.62026	0.452817	0.0606513
Corning A	0.212065	13.9734	2.55834	0.958309	66.7269	0.115516	0.12284	2.84328	5.80479	0.731779	0.00617076	1.03046	1.11116	0.167941	0.0235661	1.16662	0.0560301	0.00951023	0.103333	0.00534569	0.00159187	0.161783	1.58603	0.442424	0.0613238
Corning A	0.215787	13.8144	2.56571	0.926464	66.7725	0.12146	0.123479	2.81194	5.88068	0.746771	0.00631527	1.01782	1.10747	0.168243	0.0235215	1.16949	0.057092	0.00963915	0.104282	0.00551063	0.00160713	0.165325	1.65016	0.452273	0.0627418
Corning A	0.213606	13.5045	2.54436	0.892688	67.068	0.126507	0.126254	2.76172	5.9186	0.765404	0.00638327	1.01003	1.09156	0.166699	0.0231095	1.15941	0.0572093	0.0095069	0.10505	0.00573715	0.00161854	0.168869	1.73218	0.458643	0.0629997
Corning A (n=24)	0.208223	13.8347	2.55451	0.940443	66.9247	0.114827	0.123628	2.8231	5.70443	0.745813	0.00641548	1.02017	1.11438	0.167407	0.0229708	1.16406	0.0555254	0.00960713	0.104375	0.00542706	0.00155292	0.16749	1.6493	0.454946	0.0620356
standard deviation (σ)	0.0081192	0.170973	0.0344212	0.0426595	0.177648	0.00655047	0.00646282	0.0278607	0.17908	0.0132545	0.000111467	0.0102811	0.0126337	0.0021824	0.000375776	0.0140659	0.00252843	0.000128603	0.00119433	0.000174334	3.4203e-05	0.00190116	0.0413386	0.00644451	0.00157384
precision	3.89929	1.23583	1.34747	4.53611	0.265444	5.70463	5.22762	0.986883	3.13931	1.77719	1.73747	1.00778	1.1337	1.30365	1.63588	1.20836	4.55366	1.33862	1.14426	3.21232	2.2025	1.13508	2.50643	1.41655	2.537
Vicenzi A	0.2	14.3	2.66	1	66.56	0.13	0.1	2.87	5.03	0.79	0.006	1	1.09	0.17	0.02	1.17	0.044	0.01	0.1	0.005	0.002	0.19	1.57691	0.56	0.12
Wagner		13.4		0.82						0.739														0.46	0.073
difference Vicenzi	-0.00822271	0.465293	0.105486	0.059557	-0.364679	0.0151728	-0.0236284	0.0469018	-0.674428	-0.00681311	-0.000415483	-0.0201729	-0.0243786	0.00259296	-0.00297084	0.00594394	-0.0115254	0.000392874	-0.00437543	-0.000427056	0.000447082	0.0225097	-0.0723962	0.00505441	0.0109644
accuracy	-4.11136	3.2538	3.96564	5.9557	-0.547895	11.6713	-23.6284	1.63421	-13.4081	-0.921936	-6.92471	-2.01729	-2.23657	1.52527	-14.8542	0.508029	-26.194	3.92874	-4.37543	-8.54113	22.3541	11.8472	-4.59103	1.09879	15.0198
Corning B	0.0339607	16.7538	1.01241	4.38931	62.4939	0.799087	0.190936	0.974799	8.59738	0.0979676	0.033482	0.243091	0.343203	0.0434822	0.093305	2.65678	0.215665	0.00125134	0.0171971	0.0235861	0.00643415	0.0235331	0.41882	0.0744248	0.440584
Corning B	0.0347755	16.7451	0.999071	4.41873	62.506	0.807413	0.185943	0.986436	8.54374	0.0973089	0.033574	0.242971	0.339148	0.0432734	0.0947564	2.66155	0.221018	0.00125176	0.0172946	0.0234855	0.00642294	0.0235138	0.422053	0.0748973	0.448151
Corning B	0.0328065	16.6945	1.00553	4.476	62.4839	0.799546	0.199816	1.03983	8.54271	0.0962113	0.0333379	0.241958	0.336372	0.0431153	0.0928417	2.64878	0.21319	0.00122781	0.0172381	0.0233946	0.00628914	0.023404	0.42226	0.0741364	0.430695
Corning B	0.0329519	16.7634	0.986666	4.41949	62.3659	0.809387	0.185888	0.998617	8.63306	0.0978793	0.0342654	0.243426	0.341157	0.0433899	0.0958275	2.66964	0.229306	0.00126704	0.0176388	0.0242429	0.00642974	0.0236044	0.429842	0.0758283	0.450036
Corning B	0.0311798	16.7435	1.01622	4.30647	62.382	0.815994	0.193873	1.00226	8.70328	0.100097	0.0345479	0.246699	0.348179	0.0438339	0.0954892	2.67711	0.216976	0.00128258	0.0177665	0.0244414	0.00640424	0.0241553	0.434428	0.0774589	0.435663
Corning B	0.0309788	16.7741	0.992774	4.37549	62.3285	0.814514	0.187751	0.997146	8.68976	0.0993513	0.0348615	0.244905	0.342923	0.0434125	0.095724	2.67249	0.235932	0.00126166	0.0178335	0.0246733	0.00633975	0.0235656	0.435038	0.0760117	0.434768
Corning B	0.0315047	16.7085	1.00224	4.46203	62.4351	0.804875	0.207935	1.07047	8.55496	0.0971313	0.0337723	0.242926	0.336723	0.0430907	0.092868	2.62514	0.221463	0.00125053	0.0173667	0.0238408	0.00635583	0.0234223	0.4263	0.0754149	0.434203
Corning B	0.0306445	16.7414	0.997781	4.36519	62.3553	0.833588	0.199059	1.03538	8.64916	0.100716	0.0345761	0.243939	0.341935	0.0430172	0.0953826	2.66053	0.23412	0.00127184	0.0178035	0.0243904	0.00635557	0.023774	0.438253	0.0766473	0.429891
Corning B	0.0303885	16.7507	1.01342	4.26234	62.3468	0.832394	0.198024	1.01266	8.73664	0.101332	0.0350219	0.246215	0.344887	0.0434674	0.0953148	2.67417	0.228731	0.00128559	0.0180237	0.0248137	0.00636735	0.0240701	0.440565	0.0786182	0.433808
Corning B	0.0287687	16.8417	1.01313	4.23519	62.1911	0.84629	0.202683	1.02942	8.77374	0.102604	0.0354561	0.246802	0.346593	0.0436338	0.0951981	2.67744	0.230103	0.00130172	0.018322	0.0251947	0.0064398	0.0242827	0.4482	0.0792188	0.43613
Corning B	0.0324763	17.1178	1.02082	4.53597	61.9761	0.783613	0.196926	0.995877	8.56324	0.0965574	0.0335159	0.245963	0.349932	0.0440772	0.0944797	2.70538	0.207543	0.00125061	0.0172385	0.0223966	0.00631582	0.0231999	0.410045	0.0739929	0.425102
Corning B	0.0307798	16.7036	1.02108	4.41855	62.4433	0.822958	0.193573	1.00159	8.57901	0.0988568	0.034133	0.245146	0.347336	0.0433256	0.0932378	2.69285	0.214807	0.00124271	0.0176117	0.0234114	0.0063083	0.0235525	0.428172	0.0755148	0.420961
Corning B	0.0304978	16.6396	1.0173	4.35456	62.5942	0.849589	0.196006	1.00774	8.54587	0.100319	0.0343573	0.244171	0.344847	0.0428344	0.0929613	2.67543	0.212429	0.0012454	0.0175801	0.0230554	0.00630155	0.0238535	0.432953	0.0758712	0.417121
Corning B	0.0326399	16.8814	1.02266	4.51146	62.1475	0.802403	0.19648	0.999897	8.61381	0.0975863	0.0338174	0.24809	0.346199	0.0433209	0.0958452	2.69655	0.206266	0.00125609	0.0176066	0.0226312	0.00638143	0.0236386	0.42567	0.0751192	0.431723
Corning B	0.0319054	16.8114	1.01852	4.36469	62.4236	0.807153	0.193697	1.0181	8.5815	0.0988301	0.0342994	0.245774	0.34483	0.0429965	0.0938795	2.65613	0.206481	0.00126304	0.0177194	0.0225601	0.00641687	0.0237535	0.427858	0.0766518	0.430118
Corning B	0.0306143	16.595	0.992685	4.3351	62.7801	0.836031	0.201495	1.00384	8.52664	0.0993538	0.0343617	0.242777	0.336627	0.0422644	0.0928837	2.61707	0.215119	0.00124249	0.0176767	0.0232764	0.00632992	0.0236034	0.435247	0.0752502	0.415899
Corning B	0.031783	16.9316	1.03188	4.53363	62.1425	0.785152	0.201663	1.01339	8.55968	0.0995416	0.0330247	0.246606	0.354151	0.0440484	0.0939507	2.68104	0.218916	0.00125944	0.0175108	0.0233681	0.0065646	0.0239367	0.404592	0.0739174	0.426756
Corning B	0.0324307	16.8351	1.03575	4.4588	62.1649	0.819457	0.203556	1.01431	8.58435	0.0993204	0.0333018	0.247401	0.354641	0.0443045	0.0965346	2.72642	0.22604	0.00128265	0.0177547	0.0235775	0.0066988	0.024246	0.417782	0.0744944	0.437614
Corning B	0.0318096	16.8167	1.0338	4.45196	62.2178	0.82385	0.199297	1.00473	8.60059	0.101466	0.0335856	0.248188	0.354433	0.0439397	0.0955411	2.6812	0.226441	0.00126772	0.0178632	0.0238409	0.00669386	0.0245231	0.427629	0.0757796	0.437503
Corning B	0.0314144	16.6068	1.01412	4.35763	62.6278	0.840736	0.213115	1.00715	8.49047	0.101287	0.033861	0.244796	0.347068	0.0431658	0.0948479	2.66339	0.22792	0.00127859	0.0180643	0.0244369	0.00670213	0.024766	0.440137	0.0763188	0.44268
Corning B	0.03295	16.8701	1.004	4.5471	62.1912	0.828498	0.198823	1.00502	8.52793	0.0997802	0.0331609	0.244947	0.349714	0.0431942	0.0953157	2.65995	0.225234	0.00128559	0.0178624	0.0236065	0.00664439	0.0246089	0.427358	0.0759424	0.444471
Corning B	0.0318087	16.9029	1.01139	4.58347	62.2491	0.768071	0.19334	1.02723	8.48721	0.0984718	0.0324391	0.248263	0.347858	0.0434723	0.095694	2.66273	0.216441	0.00127407	0.0177682	0.0231494	0.00657801	0.0234856	0.408887	0.0741414	0.424661
Corning B	0.0327878	16.6545	1.01698	4.41745	62.48	0.837038	0.198513	1.00453	8.55469	0.100366	0.0333482	0.245278	0.345362	0.0435717	0.097155	2.673	0.222727	0.00127104	0.0179143	0.0240065	0.00667299	0.0239602	0.432679	0.0758394	0.440207
Corning B	0.0326324	16.4978	1.01396	4.32985	62.6837	0.865694	0.209303	0.991492	8.55397	0.101515	0.0337347	0.243291	0.344157	0.0432029	0.0961717	2.65974	0.22563	0.00127676	0.018128	0.0248231	0.00674649	0.024583	0.451981	0.0775043	0.448673
Corning B (n=24)	0.0318537	16.7659	1.01226	4.41294	62.3754	0.818056	0.197821	1.01008	8.59139	0.0993271	0.0339098	0.245151	0.345345	0.0433931	0.0948002	2.66977	0.220771	0.0012645	0.0176993	0.0237585	0.0064664	0.0238765	0.428615	0.0757914	0.434059
standard deviation (σ)	0.00126342	0.125578	0.0125616	0.0885628	0.188941	0.0224415	0.00667986	0.0193273	0.0719901	0.00167392	0.00068474	0.0018361	0.00508788	0.000434733	0.00124603	0.0225201	0.00825901	1.70597e-05	0.000286729	0.000736172	0.000148605	0.00042792	0.0113268	0.00136633	0.00917931
precision	3.96631	0.74901	1.24095	2.00689	0.302909	2.74328	3.37673	1.91344	0.837933	1.68527	2.0193	0.748968	1.47328	1.00185	1.31438	0.843521	3.74099	1.34912	1.62	3.09856	2.2981	1.79222	2.64265	1.80275	2.11476
Vicenzi B	0.02	17	1.03	4.36	61.55	0.82	0.2	1	8.56	0.089	0.03	0.25	0.34	0.046	0.1	2.66	0.19	0.001	0.019	0.025	0.01	0.04	0.414501	0.12	0.61
Wagner		16.5		4.63																		0.024		0.077	0.532
difference Vicenzi	-0.0118537	0.234119	0.0177417	-0.0529358	-0.825434	0.00194447	0.00217938	-0.0100801	-0.0313915	-0.0103271	-0.00390981	0.00484907	-0.0053447	0.00260689	0.00519979	-0.0097706	-0.0307708	-0.000264503	0.00130069	0.00124152	0.0035336	0.0161235	-0.0141136	0.00120855	0.0979408
accuracy	-59.2687	1.37717	1.72249	-1.21412	-1.34108	0.237131	1.08969	-1.00801	-0.366723	-11.6035	-13.0327	1.93963	-1.57197	5.66715	5.19979	-0.367316	-16.1951	-26.4503	6.84574	4.9661	35.336	40.3087	-3.40497	1.56955	18.4099
Corning C	0.242084	1.07283	2.65625	0.794134	35.5084	0.0944001	0.0953664	2.73521	6.36775	0.724465	0.00675357	0.00132347	0.316173	0.179995	0.0205089	1.21851	0.0632327	0.00945123	0.285764	0.00503676	0.00174043	0.189211	0	10.6546	36.7345
Corning C	0.243884	1.06795	2.67098	0.816795	35.6343	0.0902824	0.0955072	2.78123	6.29023	0.718718	0.00675668	0.00129508	0.312229	0.178625	0.0206212	1.21008	0.0639209	0.0094099	0.28494	0.00495252	0.00166146	0.190849	0	10.6262	36.6556
Corning C	0.23724	1.18629	2.64337	0.958184	35.7527	0.113807	0.11899	2.85622	6.3094	0.721323	0.0068022	0.00133857	0.31327	0.178843	0.0205244	1.21421	0.0628775	0.00952936	0.285632	0.00497452	0.00168729	0.18875	0.00113747	10.6494	36.1408
Corning C	0.237314	1.02945	2.66866	0.69144	35.4924	0.113821	0.0886306	2.78331	6.275	0.729841	0.00680801	0.00136019	0.313144	0.180706	0.020695	1.22327	0.0662297	0.00975288	0.290104	0.00510528	0.00170536	0.193202	0.000261364	10.8162	36.7396
Corning C	0.228875	1.27189	2.64482	1.1088	36.0377	0.113598	0.123118	2.88756	6.26606	0.718431	0.00674211	0.00131556	0.314075	0.178393	0.0204034	1.20287	0.0624127	0.00933463	0.287176	0.00495291	0.00165448	0.185377	3.05591e-05	10.6916	35.6113
Corning C	0.225473	1.07877	2.74781	0.743888	35.7965	0.0625228	0.0955709	2.85264	6.37104	0.757643	0.00711934	0.00136676	0.319709	0.181437	0.0210667	1.22897	0.0684964	0.009785	0.298359	0.00526403	0.00168647	0.193338	0.00155546	11.0407	35.8684
Corning C	0.22593	1.20393	2.64909	0.965923	35.6688	0.114326	0.135424	2.8824	6.2196	0.721936	0.00681017	0.00136326	0.310453	0.177176	0.0203109	1.20371	0.0634052	0.00947149	0.286819	0.00501094	0.00168756	0.190807	0	10.7197	36.1938
Corning C	0.224031	1.21048	2.66411	0.959282	35.8787	0.0978297	0.125207	2.91627	6.25919	0.738689	0.00697769	0.00130899	0.312529	0.179176	0.0205426	1.21032	0.06709	0.00952675	0.291578	0.00511363	0.00167321	0.191361	0.00145992	10.8579	35.7482
Corning C	0.213276	1.12125	2.72935	0.79907	35.5306	0.118347	0.112299	2.86454	6.25573	0.755014	0.00712595	0.00130265	0.317257	0.180486	0.0208427	1.22532	0.066924	0.00995139	0.297321	0.00522201	0.00170316	0.196366	0.000527767	11.1051	36.0437
Corning C	0.224212	1.07749	2.6541	0.833774	35.049	0.101593	0.112651	2.78524	7.06933	0.726417	0.00678554	0.00131072	0.316606	0.179339	0.0204207	1.23091	0.0600149	0.00932381	0.292246	0.00529373	0.00169183	0.188444	1.33969e-05	10.8087	36.2235
Corning C	0.218769	1.08834	2.64038	0.828067	35.4165	0.10831	0.0938527	2.80354	7.12377	0.732056	0.0068248	0.0012909	0.314814	0.178275	0.0202858	1.22364	0.0603162	0.00939342	0.290576	0.00531776	0.00166345	0.186795	0.00019832	10.7856	35.8409
Corning C	0.21599	1.08591	2.6407	0.826845	35.5158	0.112459	0.100507	2.79888	7.20614	0.739979	0.00692277	0.00130596	0.315161	0.176581	0.0202008	1.22463	0.0607016	0.00935814	0.292512	0.00542961	0.00166893	0.188038	0.000242147	10.8867	35.5464
Corning C	0.229885	1.08517	2.65781	0.830694	35.1322	0.107668	0.0978023	2.784	7.22725	0.724776	0.00678623	0.00131553	0.312796	0.177251	0.020501	1.21969	0.059052	0.00932249	0.289617	0.00517853	0.0016866	0.188062	0.000437156	10.6955	36.1137
Corning C	0.227822	1.08257	2.62435	0.823929	35.2748	0.110366	0.111449	2.77814	7.20211	0.727605	0.00687063	0.00131764	0.312101	0.176678	0.0205647	1.21761	0.0594474	0.00933137	0.290168	0.00522187	0.00167823	0.188453	0.000345595	10.7026	36.0219
Corning C	0.219702	1.0838	2.58676	0.79027	35.7245	0.11348	0.116187	2.83243	7.15041	0.730701	0.00692172	0.00130861	0.306282	0.173533	0.0201437	1.20173	0.0597257	0.00944648	0.289859	0.00525255	0.00168839	0.189075	0.000411592	10.7393	35.625
Corning C	0.225343	1.0812	2.71049	0.823755	35.5457	0.110759	0.105445	2.80135	7.69915	0.752207	0.00690841	0.00138682	0.344238	0.181655	0.0208975	1.21738	0.0676489	0.00944498	0.294147	0.00546564	0.00173835	0.187945	0.000123541	10.5636	35.2202
Corning C	0.228056	1.05071	2.67182	0.804765	34.8215	0.11991	0.0702929	2.69554	7.66926	0.74844	0.00676097	0.00136839	0.320678	0.177669	0.0206547	1.18586	0.0685464	0.00925119	0.293887	0.00551063	0.00176404	0.195063	0	10.6896	36.1237
Corning C	0.222212	1.05595	2.65076	0.791037	35.0048	0.118266	0.057811	2.70809	7.68608	0.749939	0.00682849	0.00129938	0.317416	0.175732	0.0202419	1.17548	0.0682046	0.0093098	0.292856	0.00552168	0.00173873	0.19396	3.96566e-05	10.731	35.9361
Corning C	0.214697	1.04058	2.57561	0.760929	35.2647	0.11784	0.0865486	2.74371	7.61757	0.75372	0.00686432	0.00132904	0.311619	0.171632	0.0198232	1.15738	0.0678084	0.00937349	0.29329	0.00567128	0.00171698	0.194689	0.000234284	10.7802	35.7825
Corning C	0.20542	1.04159	2.52518	0.771141	35.4231	0.117631	0.0798756	2.7784	7.55029	0.755636	0.00693132	0.00128691	0.309471	0.168366	0.0194396	1.13277	0.0669182	0.00932692	0.291497	0.00571673	0.00170737	0.19514	0.00023953	10.8145	35.7092
Corning C	0.222505	1.07653	2.67919	0.825489	35.308	0.113985	0.0944685	2.74266	7.281	0.748876	0.00683374	0.00137528	0.318927	0.177919	0.0207022	1.17986	0.069902	0.00940177	0.293856	0.00538267	0.00171842	0.191429	0.000107721	10.7595	35.8472
Corning C	0.225857	1.08827	2.70565	0.858187	35.524	0.110905	0.104802	2.80873	7.51029	0.744311	0.00676735	0.00139897	0.326042	0.180539	0.0210241	1.19877	0.0676283	0.009298	0.295394	0.00537929	0.00172948	0.185815	0.000329033	10.6009	35.3946
Corning C	0.227995	1.07542	2.66166	0.818744	35.2507	0.118758	0.0893832	2.74913	7.56887	0.744624	0.00679108	0.00135925	0.317968	0.177852	0.0208024	1.18864	0.0682369	0.00937448	0.293248	0.00550663	0.00174718	0.191095	0.000115922	10.6308	35.7594
Corning C	0.223155	1.02881	2.62724	0.793486	34.8947	0.119503	0.102777	2.69846	7.57968	0.744756	0.00679778	0.00133729	0.312745	0.174096	0.0203397	1.15695	0.0678922	0.00921652	0.290593	0.00555005	0.00173904	0.191656	0.000393031	10.7824	36.1436
Corning C (n=24)	0.225405	1.09522	2.65359	0.83411	35.4354	0.109182	0.100582	2.79449	6.9898	0.737921	0.00685379	0.00133189	0.316071	0.177581	0.0204816	1.20202	0.0648597	0.00943273	0.29131	0.00529297	0.00170319	0.190622	0.000341811	10.7555	35.9593
standard deviation (σ)	0.00867733	0.0601207	0.0462852	0.0847364	0.303709	0.012444	0.0172809	0.0589652	0.570744	0.0128859	0.000102382	3.19693e-05	0.00713251	0.00308387	0.000357491	0.0252883	0.0034753	0.000170725	0.00345062	0.000220785	3.00932e-05	0.00303043	0.000427365	0.124979	0.378072
precision	3.84966	5.48939	1.74425	10.1589	0.857076	11.3975	17.1809	2.11005	8.16538	1.74625	1.4938	2.40031	2.25662	1.73659	1.74543	2.10381	5.35819	1.80992	1.18452	4.17128	1.76687	1.58976	125.03	1.162	1.05139
Vicenzi C	0.2	1.07	2.76	0.87	34.87	0.14	0.1	2.84	5.07	0.79	0.006	0.82a	0.34	0.18	0.02	1.13	0.052	0.01	0.29	0.005	0.002	0.19	0.0270327	11.4	36.7
Wagner				0.736
difference Vicenzi	-0.0254053	-0.0252163	0.10641	0.0358903	-0.565422	0.030818	-0.000581902	0.0455134	-1.9198	0.0520791	-0.000853786		0.0239291	0.0024185	-0.00048158	-0.0720234	-0.0128597	0.000567271	-0.00130999	-0.000292969	0.000296814	-0.000621546	0.0266909	-10.7555	-35.9593
accuracy	-12.7026	-2.35666	3.85545	4.12532	-1.62152	22.0128	-0.581902	1.60259	-37.8659	6.59229	-14.2298		7.03797	1.34361	-2.4079	-6.37375	-24.7302	5.67271	-0.451719	-5.85937	14.8407	-0.32713	98.7356
Corning D	0.113778	1.31767	3.95792	5.40041	55.6979	3.86301	0.195827	10.9781	14.904	0.376058	0.0170941	0.558494	0.516857	0.0189599	0.0482481	0.362299	0.106188	0.00471709	0.0559754	0.0124503	0.00287417	0.0810676	0.870666	0.285381	0.208136
Corning D	0.114157	1.29137	3.9111	5.45302	55.6082	3.86278	0.19254	11.0368	14.9454	0.376573	0.0171113	0.555907	0.512788	0.0188432	0.0481344	0.362194	0.112688	0.00465318	0.0564047	0.0125937	0.00286497	0.0808116	0.877325	0.286983	0.212807
Corning D	0.109977	1.30526	3.88473	5.38703	55.4765	3.92724	0.193166	11.1742	14.9263	0.378874	0.0172608	0.557312	0.51199	0.0188231	0.0481066	0.361963	0.116766	0.00472696	0.0565957	0.0126943	0.00284452	0.0815087	0.900407	0.288217	0.210836
Corning D	0.105898	1.30772	3.95525	5.27088	55.5131	3.93533	0.197462	11.0448	15.0525	0.384202	0.0175451	0.559491	0.519678	0.0189966	0.0484315	0.364044	0.109268	0.00473927	0.0572424	0.0128516	0.00286805	0.0816801	0.899645	0.289117	0.202396
Corning D	0.103653	1.30263	3.89081	5.34146	55.3381	3.9517	0.190893	11.2334	15.0402	0.382373	0.0174831	0.556069	0.507976	0.018637	0.0480073	0.359761	0.116088	0.00472476	0.0572611	0.0129078	0.00281722	0.081242	0.902855	0.290531	0.203017
Corning D	0.105434	1.43583	3.89451	5.48909	55.4994	3.86728	0.216475	11.062	14.8591	0.37553	0.0172157	0.551825	0.508056	0.0185935	0.0474976	0.358451	0.108105	0.00472292	0.0565592	0.0126742	0.00282171	0.0812902	0.887728	0.288968	0.205005
Corning D	0.104029	1.32952	3.88624	5.36113	55.3192	3.95887	0.206077	11.2067	15.0092	0.383972	0.0174679	0.556524	0.512979	0.0186269	0.0481554	0.360465	0.118275	0.00468989	0.0570363	0.0129467	0.00282405	0.0812263	0.906588	0.289069	0.202125
Corning D	0.100757	1.29593	3.96212	5.24008	55.2046	3.99111	0.204478	11.1762	15.1689	0.389361	0.0177507	0.561598	0.517765	0.0188713	0.048146	0.362603	0.113847	0.00477916	0.0581681	0.013122	0.00284315	0.0823812	0.917919	0.296081	0.205125
Corning D	0.0993999	1.32468	3.94303	5.16545	55.1784	4.05743	0.208429	11.3087	15.052	0.388443	0.0178573	0.558336	0.514885	0.0186694	0.0478793	0.36173	0.115939	0.00486652	0.0582058	0.0130305	0.00286812	0.0830008	0.93352	0.29471	0.202295
Corning D	0.106698	1.31783	4.00463	5.53769	55.2157	3.85352	0.198588	11.2312	14.9535	0.374786	0.0172244	0.565433	0.520586	0.0189488	0.0476559	0.365876	0.100996	0.00469883	0.0571808	0.0121742	0.0028253	0.0818107	0.875733	0.29093	0.20181
Corning D	0.101891	1.29991	3.99081	5.44179	55.2854	3.95244	0.194667	11.1109	15.0311	0.381144	0.0173363	0.55993	0.517838	0.0185095	0.0468589	0.362663	0.103368	0.0046231	0.0573068	0.01247	0.00277594	0.0814502	0.893394	0.291979	0.197791
Corning D	0.100284	1.29312	3.92529	5.25049	55.4136	4.08911	0.194745	11.1971	14.9429	0.382467	0.0174379	0.554336	0.513311	0.018236	0.0465348	0.360316	0.103526	0.00465294	0.0569736	0.0124044	0.00281221	0.0817663	0.910341	0.291267	0.194984
Corning D	0.108692	1.31658	4.00546	5.51006	55.2425	3.90301	0.201331	11.1801	14.9417	0.373396	0.0170787	0.564572	0.512017	0.0186225	0.0480667	0.364474	0.102291	0.00465662	0.0564617	0.0118721	0.0028382	0.0821043	0.897408	0.287689	0.205083
Corning D	0.103354	1.30088	3.93297	5.33075	55.5147	3.95842	0.188753	11.167	14.9303	0.377204	0.0172671	0.555479	0.508458	0.0183411	0.0475133	0.358664	0.104159	0.00466763	0.0567393	0.0121285	0.00278144	0.0810264	0.897722	0.290036	0.197956
Corning D	0.100187	1.29181	3.8886	5.23142	55.6318	3.96218	0.196303	11.1861	14.9442	0.380476	0.0174952	0.554046	0.502551	0.0181898	0.0467192	0.352665	0.100478	0.00466116	0.0568614	0.0122721	0.00277918	0.0816526	0.909422	0.291119	0.19368
Corning D	0.106057	1.3192	4.02224	5.50611	55.2351	3.83001	0.202221	11.3355	14.8943	0.37374	0.0167837	0.561556	0.522753	0.0190183	0.0490505	0.363984	0.108453	0.00467354	0.0564546	0.012171	0.00294846	0.0797355	0.849943	0.281765	0.202348
Corning D	0.108435	1.30338	4.04702	5.4351	54.9957	3.95787	0.203536	11.2908	15.059	0.379443	0.017019	0.563564	0.52336	0.0191227	0.0492826	0.36736	0.110588	0.00472148	0.0570438	0.0123416	0.0029761	0.080914	0.873255	0.284525	0.208671
Corning D	0.107096	1.31042	4.04812	5.36986	55.1079	3.98939	0.196184	11.2449	15.0021	0.381268	0.017048	0.560898	0.522973	0.0189997	0.0487216	0.362955	0.113003	0.00472731	0.0570979	0.012451	0.00299864	0.0820892	0.897698	0.289284	0.20682
Corning D	0.103809	1.28438	3.94471	5.27654	55.4836	3.97235	0.208417	11.2335	14.8677	0.381824	0.0171551	0.554676	0.513688	0.0185598	0.0478313	0.357135	0.114453	0.00470501	0.0574867	0.0127169	0.00296208	0.0824995	0.910734	0.292436	0.210196
Corning D	0.100234	1.26931	3.83747	5.16039	55.9169	4.0072	0.215872	11.2863	14.5764	0.383386	0.0171682	0.545499	0.508721	0.0180604	0.0467271	0.351591	0.115501	0.00468224	0.0572749	0.0128632	0.00296185	0.0847414	0.931598	0.292449	0.210275
Corning D	0.106556	1.32545	3.95029	5.45634	55.2865	3.87307	0.198069	11.323	14.8735	0.373943	0.0167197	0.564151	0.519242	0.0187623	0.048654	0.361995	0.113045	0.00473613	0.0572738	0.0121038	0.00294218	0.0823959	0.883082	0.288766	0.213629
Corning D	0.106911	1.32179	3.94223	5.58877	55.276	3.73345	0.194288	11.5184	14.7688	0.369336	0.0164727	0.562832	0.516453	0.0187117	0.0491357	0.360388	0.109266	0.00470133	0.0567736	0.0120833	0.00295423	0.0791806	0.863285	0.281904	0.202596
Corning D	0.108608	1.30863	3.98049	5.40701	55.2657	3.98079	0.200297	11.2766	14.8628	0.374962	0.0167793	0.55976	0.513297	0.0188274	0.0494248	0.366075	0.113082	0.00475905	0.0569751	0.0123767	0.00297939	0.0813832	0.899481	0.287136	0.206757
Corning D	0.107782	1.28645	3.93394	5.25449	55.5162	4.11028	0.211017	11.0967	14.848	0.378172	0.0169444	0.550801	0.504559	0.0185102	0.0484868	0.35874	0.113996	0.00469634	0.0570546	0.0127529	0.0029886	0.0831598	0.933798	0.292902	0.21129
Corning D (n=24)	0.10557	1.31082	3.9475	5.36939	55.3843	3.94116	0.200401	11.2041	14.9356	0.379206	0.0171965	0.558045	0.514282	0.018685	0.0480529	0.361183	0.11014	0.0047076	0.057017	0.0125189	0.00288124	0.0816716	0.896814	0.289302	0.204818
standard deviation (σ)	0.00394527	0.0298462	0.0528959	0.116386	0.204261	0.0827932	0.00740861	0.114309	0.114435	0.00479855	0.00031921	0.00473185	0.0055967	0.000273876	0.000787254	0.00368999	0.00530378	4.92545e-05	0.000498225	0.000332502	7.24909e-05	0.00108483	0.0211494	0.00348197	0.00529201
precision	3.73712	2.2769	1.33998	2.16759	0.368807	2.10073	3.69688	1.02024	0.76619	1.26542	1.85625	0.847934	1.08825	1.46575	1.63831	1.02164	4.81547	1.04627	0.873819	2.65601	2.51596	1.32828	2.35828	1.20358	2.58377
Vicenzi D	0.1	1.2	3.94	5.3	55.24	3.93	0.4	11.3	14.8	0.38	0.015	0.55	0.52	0.023	0.05	0.38	0.1	0.005	0.057	0.0125	0.005	0.1	0.874056	0.51	0.48
Wagner																								0.291	0.241
difference Vicenzi	-0.00556987	-0.110823	-0.00749953	-0.0693907	-0.144288	-0.0111596	0.199599	0.09588	-0.135579	0.000794403	-0.00219648	-0.0080454	0.00571757	0.00431496	0.00194711	0.018817	-0.0101404	0.000292398	-1.6976e-05	-1.88638e-05	0.00211876	0.0183284	-0.0227581	0.00169815	0.0361821
accuracy	-5.56987	-9.23522	-0.190343	-1.30926	-0.261201	-0.283959	49.8996	0.848495	-0.916077	0.209053	-14.6432	-1.4628	1.09953	18.7607	3.89423	4.95185	-10.1404	5.84796	-0.0297825	-0.15091	42.3752	18.3284	-2.60373	0.583555	15.0133
NIST 612	0.0135807	13.4276	0.0102039	2.22335	72.4859	0.00732709	0.0445744	0.0477927	11.5246
NIST 612	0.0127479	13.3833	0.0103048	2.11861	72.5951	0.00492244	0.0301931	0	11.6259
NIST 612	0.0125021	13.3925	0.0102462	2.25408	72.4584	0.0172267	0.0423736	0.085134	11.5098
NIST 612	0.0120442	13.4194	0.0103757	2.10278	72.5193	0.0176889	0.032285	0	11.6653																	37.1852	35.2001	37.0298	34.3288	35.1703	38.0022	37.6967	36.1919	36.951	33.0054	31.5967	76.6048	37.8408	37.6288	35.3097	32.7453	20.437	41.5422	37.891	34.6041	33.3146	41.1721	36.3796	38.8389
NIST 612	0.0119187	13.3931	0.0105802	2.09426	72.5012	0.0173917	0.0376426	0.0105497	11.701																	37.2487	35.2875	37.1525	32.9826	34.8861	37.6085	37.4807	36.8005	36.8829	33.7382	31.7784	76.6326	37.9611	37.7832	36.0193	33.3331	20.6949	42.5818	38.2725	34.9908	34.5195	41.5914	36.7814	39.8214
NIST 612	0.0117418	13.3941	0.010351	2.06311	72.5368	0.00586084	0.0310819	0	11.7283																	36.0903	33.649	37.2425	34.6013	34.195	36.7967	36.3468	36.8506	36.4814	33.7625	31.9153	76.982	38.7964	39.0379	36.5162	33.9657	20.2038	42.444	38.1963	35.2398	35.5366	41.6121	37.0088	41.9254
NIST 612	0.0119276	13.4668	0.0103226	2.22366	72.3035	0.0176537	0.0497181	0.0817813	11.6149																	34.9967	32.3614	37.3404	34.4876	33.7764	35.9897	35.7706	36.9198	35.8652	33.9186	31.5401	76.8607	38.6045	39.2651	37.092	33.7566	20.0122	43.5486	38.4092	35.3571	36.095	41.3252	37.1177	43.2588
NIST 612	0.0117808	13.4051	0.0100659	2.13629	72.4492	0.0133537	0.0465309	0.0351123	11.6738																	37.2001	36.221	37.2055	38.0115	34.8744	38.0806	36.8397	35.192	36.7325	32.6218	31.7994	77.5217	37.6926	37.5104	35.4365	33.1089	19.869	41.7553	37.8304	34.8924	34.2323	41.0648	37.0297	38.0015
NIST 612	0.0108181	13.4926	0.0105392	2.01999	72.3911	0.0185408	0.03772	0	11.7962																	38.0156	34.2758	36.446	36.994	34.7967	38.218	37.3108	34.6255	36.678	31.1865	31.8146	76.826	37.1609	37.8249	34.6024	31.8054	19.8101	39.5007	37.34	33.9838	33.8064	40.8308	36.5353	35.4511
NIST 612	0.0108792	13.5251	0.0106053	2.03376	72.3212	0.0183708	0.042518	0.015167	11.7993																	36.8363	35.9443	37.2818	38.3629	34.3867	37.606	36.6639	35.7076	36.8008	33.077	31.5604	77.0274	38.2466	39.0596	35.7513	33.709	20.5481	42.0981	37.8657	34.8075	35.9487	41.1856	37.7426	38.7139
NIST 612	0.0113769	13.4212	0.0103049	2.13424	72.644	0.00858371	0.0431954	0.00639538	11.5051																	40.6893	35.3332	38.1583	35.3493	34.9158	37.6599	36.3664	34.4828	36.7437	32.028	32.1887	75.941	38.6232	38.5465	34.9432	33.308	20.1621	39.3498	37.3615	34.6746	34.3693	41.3767	35.752	37.9541
NIST 612	0.0109221	13.3282	0.0106663	2.1028	72.7673	0.0131718	0.0411064	0.00553581	11.5032																	39.8269	33.9208	38.4008	32.5484	34.3664	36.9266	35.5654	35.6251	36.4631	32.2817	31.9399	75.9695	38.5784	38.5004	35.488	33.1679	19.4931	40.2378	36.929	34.3397	35.1555	41.1348	35.7182	39.054
NIST 612	0.0109183	13.3073	0.0105608	2.10834	72.7581	0.0130893	0.0414424	0.00430904	11.5283																	39.706	33.9087	38.4484	35.5574	34.284	36.8656	36.0701	35.4586	36.5214	32.9038	31.7195	76.2742	38.7768	38.9263	35.5174	33.3514	19.7357	39.8998	37.1329	34.3773	35.6099	40.9058	36.2443	39.5867
NIST 612	0.0114508	13.5553	0.0107218	2.13625	72.4445	0.013529	0.0448113	0.00593668	11.5605																	42.1034	35.5627	37.8683	36.1998	34.7607	38.1315	36.2349	34.9494	37.483	32.1002	32.0145	75.5058	37.757	37.3139	34.4247	32.8998	20.3963	39.6526	37.4633	34.5193	35.4047	41.459	36.0912	36.6198
NIST 612	0.00518984	13.3997	0.0105926	2.11944	72.6633	0.0138442	0.0334873	0.00515225	11.5433																	40.256	33.4053	38.5256	35.9609	33.4551	36.361	35.3383	36.4986	35.9948	32.8828	31.966	75.8891	38.4512	38.355	35.5899	33.5648	20.2747	41.2879	37.2797	34.1903	36.1877	41.3528	36.4161	39.6195
NIST 612	0.0107562	13.3596	0.0102743	2.03249	72.8747	0.0135328	0.0435468	0.00617227	11.4347																	42.9538	38.8276	36.6216	37.5202	34.0472	36.6771	35.8523	34.1412	35.8319	32.0318	30.9499	73.636	37.0965	36.8152	34.1322	32.1544	19.9163	38.9284	36.2429	33.641	35.0873	40.2481	34.8228	36.9328
NIST 612	0.0113341	13.5828	0.0109169	2.11857	72.3415	0.0204091	0.0481144	0.00683947	11.6428																	41.984	37.0158	37.8134	37.1596	34.7377	37.7056	36.3667	35.8601	36.7177	34.0157	31.8652	76.3667	38.7472	38.3866	35.6984	33.7038	20.2107	41.8177	37.2019	34.6119	34.0615	41.6276	36.0759	38.751
NIST 612	0.0113622	13.5088	0.0107619	2.09262	72.4902	0.0200647	0.0433202	0.00468243	11.6043																	41.8216	37.0435	37.1748	37.3981	34.1748	36.5099	35.8678	35.6089	35.9911	33.188	31.5	75.5112	37.9704	37.7256	34.851	32.5503	19.9175	41.6118	36.4638	33.966	31.9951	40.5741	35.9077	38.0066
NIST 612	0.0108346	13.3714	0.0104133	2.04722	72.8847	0.0209896	0.0529167	0.00603157	11.3779																	40.6442	33.5977	38.5166	36.5264	34.9199	37.468	37.0839	37.2199	36.548	32.7795	32.509	77.7467	39.5054	39.6211	36.5383	33.1159	20.1238	40.7689	37.3956	34.978	34.0798	42.1424	37.2269	39.9956
NIST 612	0.01042	13.2643	0.0103083	1.99851	73.1657	0.0206335	0.0545072	0.00758572	11.2506																	39.561	33.7874	38.9648	37.7394	34.8711	37.9693	36.0034	37.5434	36.148	35.0567	32.497	78.3624	39.75	39.6791	36.6114	33.9217	19.8859	41.9161	37.5569	35.0616	36.855	42.0107	37.3537	40.5578
NIST 612	0.0116628	13.5974	0.010635	2.09439	72.2973	0.019132	0.0479442	0.00706352	11.6985																	45.5613	39.5909	37.0923	36.8202	34.4105	37.3336	36.0081	33.8214	36.3776	32.074	31.596	75.8288	38.1652	38.2462	34.9821	32.9092	19.5587	40.1305	36.4942	34.0551	33.8385	41.0146	35.4731	38.0077
NIST 612	0.0113232	13.6709	0.0106024	2.1734	72.3431	0.019043	0.0467776	0.00666261	11.5083																	44.4544	37.4056	37.3707	36.3729	34.6463	37.3218	35.0479	34.99	36.5525	32.9547	31.7867	76.1679	38.5727	38.2383	35.2783	33.1208	18.8716	39.7172	36.8272	34.1637	34.3567	41.0832	35.9326	38.5481
NIST 612	0.0110365	13.5327	0.0106781	2.11723	72.4498	0.0203555	0.0474038	0.00595035	11.5921																	41.3698	36.4662	38.1249	35.6844	34.4221	37.5019	36.561	36.5398	36.2385	34.3701	32.2835	76.712	38.8528	38.7588	35.8582	33.1573	19.9701	41.7656	36.9324	34.3863	37.9065	41.3869	36.0486	39.0682
NIST 612	0.0115737	13.3789	0.0105867	2.05472	72.6974	0.0205731	0.0509112	0.00576698	11.5507																	42.0925	36.5876	38.037	37.7236	34.1008	37.22	35.1218	36.3839	35.7097	33.3115	31.3163	75.7665	38.5658	38.3897	35.3884	32.8215	19.3424	41.6386	36.2587	34.0038	36.6762	40.733	35.7903	38.7001
NIST 612 (n=24)	0.0112543	13.4408	0.0104841	2.10834	72.5576	0.015637	0.0430884	0.0149842	11.5808																	40.0284	35.4949	37.6579	36.1109	34.4856	37.3311	36.2665	35.7815	36.4625	33.0137	31.8161	76.3873	38.3674	38.3625	35.5252	33.151	19.973	41.0568	37.3021	34.5164	35.0017	41.2301	36.3547	38.9244
standard deviation (σ)	0.00144451	0.0968765	0.000203455	0.0629767	0.211195	0.00481004	0.00650577	0.0232031	0.124161																	2.72793	1.82393	0.672715	1.57161	0.421177	0.610089	0.716426	1.01566	0.423834	0.894802	0.361244	0.949283	0.645387	0.737461	0.733881	0.537821	0.415621	1.22219	0.621892	0.455658	1.32857	0.437252	0.697316	1.66853
precision	12.8352	0.720767	1.94061	2.98703	0.291073	30.7606	15.0986	154.851	1.07213																	6.81498	5.13857	1.78639	4.35219	1.22131	1.63427	1.97544	2.83851	1.16238	2.71039	1.13541	1.24272	1.68212	1.92235	2.0658	1.62234	2.08091	2.97682	1.66717	1.32012	3.79572	1.06052	1.91809	4.28659
Jochum NIST SRM 612		13.7		2.03	72.1				11.5																	40.2	34.3	38.8	36.4	35.5	38.8	37.8	39.1	36.9	35.7	31.4	78.4	38.3	37.9	38.9	35.79	22	28.1	38.9	38.6	34.7	42.7	39.3	36
difference	-0.0112543	0.259245	-0.0104841	-0.0783383	-0.457638	-0.015637	-0.0430884	-0.0149842	-0.0808146																	-1.89246	-2.28756	0.763039	-1.3236	1.39924	1.57998	2.67818	2.71605	1.19031	2.38851	0.0836822	2.63352	-0.2658	-0.48972	3.51158	2.96853	2.65762	-13.5386	2.64132	4.59618	-1.97621	1.96704	3.50974	-2.70008
accuracy		1.8923		-3.85903	-0.634727				-0.702736																	-4.70761	-6.66928	1.96659	-3.63628	3.94153	4.07212	7.08512	6.94642	3.22577	6.69051	0.266504	3.35909	-0.693994	-1.29214	9.0272	8.29431	12.0801	-48.1799	6.79002	11.9072	-5.69513	4.60666	8.93064	-7.50023
[truncated: 22 more columns]
